# Supplementary material
Source: Royal Society of Chemistry journal article supplement (doi:10.1039/d6qi00435k)
Supplement: d6qi00435k1.pdf [file d6qi00435k1.pdf]

## Supporting Information

### Assembly of Protein-mimetic Helical Chiral Metal-Organic Framework for Enantioseparation

Siyu Tu,<sup>a</sup> Jie Qi,<sup>a</sup> Wenxuan Li,<sup>b</sup> Wenjun Chen,<sup>a</sup> Xiaoyu Ma,<sup>a</sup> Kun-yu Wang,<sup>c</sup> Zhenyu Wang,<sup>d</sup> Mengmeng Li,<sup>d</sup> Xiang Wu<sup>\*a</sup> and Chengfeng Zhu<sup>\*a</sup>

<sup>a</sup>School of Chemistry and Chemical Engineering, Hefei University of Technology, Hefei 230009, P. R. China.

<sup>b</sup>Department of Chemistry, Princeton University, Princeton, New Jersey, 08544, United States.

<sup>c</sup>Department of Chemistry, Texas A&M University, College Station, Texas 77843-3255, United States.

<sup>d</sup>Anhui Province Key Laboratory of Green Manufacturing in Phosgene Industry, Anhui Guangxin Agrochemical Company, Ltd., Guangde 242235, China.

#### Table of Content

|                                                                                                                                      |    |
|--------------------------------------------------------------------------------------------------------------------------------------|----|
| 1. Materials and general procedures. ....                                                                                            | 1  |
| 2. Synthesis of chiral ligand ( <i>S</i> )-H <sub>2</sub> L and chiral MOFs ( <i>S</i> )- <b>1</b> and ( <i>R</i> )- <b>1</b> . .... | 2  |
| 3. Table S1. Crystal data and structure refinement for ( <i>S</i> )- <b>1</b> and ( <i>R</i> )- <b>1</b> . ....                      | 2  |
| 4. Table S2. Selected bond lengths [Å] and angles [°] for ( <i>S</i> )- <b>1</b> and ( <i>R</i> )- <b>1</b> . ....                   | 3  |
| 5. Figures S1. <sup>1</sup> HNMR of L-Me <sub>2</sub> and H <sub>2</sub> L. ....                                                     | 3  |
| 6. Figures S2-S4. Additional X-ray crystallographic structure of ( <i>S</i> )- <b>1</b> . ....                                       | 4  |
| 7. Figure S5. Adsorption of 4-chloroisatin by ( <i>S</i> )- <b>1</b> monitored by UV-Vis. ....                                       | 5  |
| 8. Figure S6. HPLC spectra of SO resolved by ( <i>S</i> )- <b>1</b> in different solvents (in Table 1). ....                         | 5  |
| 9. Figure S7. HPLC spectra of dynamic enantiosorption of ( <i>S</i> )- <b>1</b> towards PGE. ....                                    | 9  |
| 10. Figure S8. HPLC spectra of epoxides (in Figure 4). ....                                                                          | 12 |
| 11. Figure S9. HPLC spectra of 1-phenylethanol, phenylethanediol, and sec-butylamine. ....                                           | 25 |
| 12. Figure S10. GC spectra of SO during the cyclic enantioseparation. ....                                                           | 28 |

## 1. Materials and general procedures.

All of the chemicals are commercially available and used without any further purification. Thermogravimetric analysis of (*S*)-**1** was carried out in a nitrogen atmosphere with a heating rate of 10 °C/min on a TGA-50 thermogravimetric analyzer. Powder X-ray diffraction (PXRD) data were collected on a DMAX2500 diffractometer using Cu K $\alpha$  radiation. Simulated PXRD patterns were generated from the single-crystal structural data of (*S*)-**1** using the XPow module of the SHELXTL software package. The dye adsorption experiment was monitored using an Agilent Technologies Cary UV/Vis Spectrometer. The infrared (IR) spectrum (KBr pellet) was recorded (500-4000 cm<sup>-1</sup> region) on a Nicolet Magna 750 Fourier transform infrared (FTIR) spectrometer. Analytical high-performance liquid chromatography (HPLC) was performed on an Agilent Technologies 1260 Infinity II system equipped with a UV-vis detector. Analytical ChiralCel OD-H/OD/OJ-H/AS-H/IC-H/AD-H/IA-H columns (4.6 mm  $\times$  25 cm) from Daicel were used.

**X-ray Crystallography:** Single-crystal X-ray diffraction (SC-XRD) data for chiral MOFs, (*S*)-**1** and (*R*)-**1**, were collected at 100 K on BL17B beamline of the National Facility for Protein Science (NFPS, Shanghai) using synchrotron radiation, with wavelengths of 0.71253 Å and 0.68883 Å, respectively. All of the diffraction datasets were processed through indexing, integration, and scaling with the APEX4 program. The structures of (*S*)-**1** and (*R*)-**1** were solved by direct method and refined *via* full-matrix least-squares technique on  $F^2$  using the SHELXS-2014 within the Olex2 interface. All non-hydrogen atoms belonging to the flexible ligands were refined with anisotropic displacement parameters, while all ligand-attached hydrogen atoms were placed in calculated positions and refined using a riding model. Contributions to scattering due to these highly disordered guest molecules in (*S*)-**1** and (*R*)-**1** were removed using the SQUEEZE subroutine of the PLATON software package. The structures were then refined again using the resulting new HKL file. (*S*)-**1** and (*R*)-**1** can be best formulated as [ZnL(TMDP)], on the basis of single-crystal diffraction, IR spectra, UV-vis spectra, and thermogravimetric analyses (TGA). Crystal data and details of the data collection are given in Table S1, while the selected bond distances and angles are presented in Table S2. CCDC numbers are 2535054 for (*S*)-**1** and 2535261 for (*R*)-**1**, respectively, which contain the supplementary crystallographic data for this paper. These data can be obtained free of charge via [www.ccdc.cam.ac.uk/data\\_request/cif](http://www.ccdc.cam.ac.uk/data_request/cif).

**Enantioseparation procedure:** Prior to the enantioselective sorption experiment, the pristine crystals of (*S*)-**1** and (*R*)-**1** were treated three times with anhydrous methanol and acetone, respectively, to exchange the guest solvent molecules (e.g., DMF) within their chiral pores. Subsequently, the solvent-exchanged crystals (ca. 100 mg) were immersed in a 2 mL solution of indicated racemic analyte (10 mM) for 12 h at room temperature. Afterward, the solid sample was filtered and washed several times with fresh solvent to remove the racemic analytes adsorbed on the crystal surfaces. Finally, the solid samples were immersed in acetone to extract the chiral epoxides encapsulated within their channels. The enantiomeric purity of the extracted chiral guest was determined by HPLC.

**Dye adsorption:** About 50 mg solvent-exchanged crystals of (*S*)-**1** were immersed in 2.5 mL ethanol solution of 50  $\mu$ M dye molecule, 4-chloroisatin. Then the 4-chloroisatin content in solution was monitored by UV-Vis at different time periods.

## 2. Synthesis of chiral ligand (*S*)-H<sub>2</sub>L and chiral MOFs (*S*)-1 and (*R*)-1.

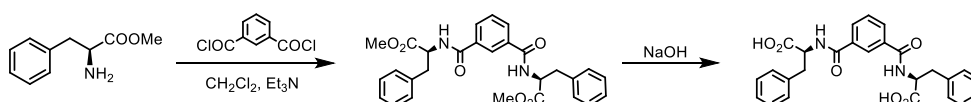

(*S*)-H<sub>2</sub>L was synthesized from optically pure *L*-phenylalanine methyl ester according to the above reaction routine. *L*-phenylalanine methyl ester (3 g, 16.74 mmol) was dissolved in dichloromethane (60 mL), followed by the dropwise addition of isophthaloyl chloride (1.70 g, 8.37 mmol) and Et<sub>3</sub>N (10.0 mL). The resulting reaction mixture was stirred at room temperature for an additional 6 h. After that, the mixture was washed with water (3 × 20 mL), 2 M HCl (3 × 20 mL), and a saturated NaHCO<sub>3</sub> solution (3 × 20 mL). Subsequently, the organic phase was dried over Na<sub>2</sub>SO<sub>4</sub> and concentrated under reduced pressure, affording the methylated chiral ligand, *L*-Me<sub>2</sub> (ca. 3.87 g), with a yield of ca. 94.6%.

The hydrolysis of *L*-Me<sub>2</sub> (3.87 g, 7.92 mmol) was carried out in a mixed alkaline solution of NaOH (0.32 g, 79.22 mmol) in MeOH/THF/H<sub>2</sub>O (20 mL/20 mL/5 mL) at room temperature for 6 h. The resulting mixture was acidified with 2 M HCl and filtered. The product was extracted from the aqueous phase with ethyl acetate. The organic phase was dried over Na<sub>2</sub>SO<sub>4</sub> and concentrated under reduced pressure to give the chiral ligand (*S*)-H<sub>2</sub>L (3.33 g) in a yield of ca. 91.3%. (*R*)-H<sub>2</sub>L was synthesized using the identical procedure, but employing *D*-phenylalanine as the chiral source.

A mixture of Zn(NO<sub>3</sub>)<sub>2</sub>·6H<sub>2</sub>O (14.5 mg, 0.05 mmol), H<sub>2</sub>L (18.4 mg, 0.05 mmol) and TMDP co-ligand (8 mg, 0.05 mmol) was placed in a glass vial containing DMF (2.5 mL), MeCN (2.5 mL). The vial was sealed tightly and heated at 60 °C for three days. Colorless block crystals of [ZnL(TMDP)] ((*S*)-1) were generated. The crystals of (*R*)-1 can be obtained under the same synthetic condition as that of (*S*)-1 except the (*S*)-H<sub>2</sub>L was replaced by (*R*)-H<sub>2</sub>L.

## 3. Table S1. Crystal data and structure refinement for (*S*)-1 and (*R*)-1.

|                                 |                                                                                         |                                                                                         |
|---------------------------------|-----------------------------------------------------------------------------------------|-----------------------------------------------------------------------------------------|
| Empirical formula               | C <sub>39</sub> H <sub>36</sub> N <sub>4</sub> O <sub>6</sub> Zn                        | C <sub>39</sub> H <sub>36</sub> N <sub>4</sub> O <sub>6</sub> Zn                        |
| Formula weight                  | 722.09                                                                                  | 722.09                                                                                  |
| Temperature (K)                 | 100                                                                                     | 100                                                                                     |
| Identification code             | ( <i>S</i> )-1                                                                          | ( <i>R</i> )-1                                                                          |
| Wavelength (Å)                  | 0.71253                                                                                 | 0.68883                                                                                 |
| Crystal system, space group     | Trigonal, <i>P</i> 3 <sub>2</sub> 21                                                    | Trigonal, <i>P</i> 3 <sub>1</sub> 21                                                    |
| Unit cell dimensions            | a = 18.5336(1) Å<br>b = 18.5336(1) Å<br>c = 23.6582(1) Å<br>α = 90°, β = 90°, γ = 120°. | a = 18.5346(1) Å<br>b = 18.5346(1) Å<br>c = 23.6007(1) Å<br>α = 90°, β = 90°, γ = 120°. |
| Volume                          | 7037.7(1) Å <sup>3</sup>                                                                | 7021.4(1) Å <sup>3</sup>                                                                |
| Z, Calculated density           | 6, 1.022 mg/m <sup>3</sup>                                                              | 6, 1.025 mg/m <sup>3</sup>                                                              |
| Absorption coefficient          | 0.563 mm <sup>-1</sup>                                                                  | 0.522 mm <sup>-1</sup>                                                                  |
| F(000)                          | 2256                                                                                    | 2256                                                                                    |
| θ range for data collection (°) | 2.144 to 24.779                                                                         | 1.487 to 29.837                                                                         |
| Limiting indices                | -21 ≤ h ≤ 21,<br>-21 ≤ k ≤ 21,<br>-27 ≤ l ≤ 27                                          | -24 ≤ h ≤ 24,<br>-26 ≤ k ≤ 26,<br>-30 ≤ l ≤ 29                                          |
| Reflections                     | 86189/7945, Rint = 0.0785                                                               | 102754/13097, Rint = 0.0465                                                             |

|                                   |                                             |                                             |
|-----------------------------------|---------------------------------------------|---------------------------------------------|
| collected/independent reflections |                                             |                                             |
| Completeness to theta             | 99.00%                                      | 99.00%                                      |
| Refinement method                 | Full-matrix least-squares on F <sup>2</sup> | Full-matrix least-squares on F <sup>2</sup> |
| Data / restraints / parameters    | 7945 / 0 / 451                              | 13097 / 0 / 451                             |
| Goodness-of-fit on F <sup>2</sup> | 1.072                                       | 1.027                                       |
| Final R indices [I>2sigma(I)]     | R1 = 0.0531, wR2 = 0.1218                   | R1 = 0.0596, wR2 = 0.1591                   |
| R indices (all data)              | R1 = 0.0668, wR2 = 0.1259                   | R1 = 0.0569, wR2 = 0.1621                   |
| Absolute structure parameter      | 0.070(5)                                    | 0.141(4)                                    |

**4. Table S2. Selected bond lengths [Å] and angles [°] for (S)-1 and (R)-1.**

| Bond Lengths        | (S)-1    | (R)-1      |
|---------------------|----------|------------|
| Zn(1)-O(1)#1        | 1.853(7) | 1.948(3)   |
| Zn(1)-O(6)          | 1.866(8) | 1.942(2)   |
| Zn(1)-N(3)#2        | 1.960(1) | 2.002(3)   |
| Zn(1)-N(4)          | 1.962(8) | 2.062(3)   |
| Bond Angles         | (S)-1    | (R)-1      |
| O(1)#1-Zn(1)-O(6)   | 103.6(1) | 104.09(11) |
| O(1)#1-Zn(1)-N(3)#2 | 110.7(5) | 120.87(11) |
| O(1)#1-Zn(1)-N(4)   | 110.6(1) | 105.07(12) |
| O(6)-Zn(1)-N(3)#2   | 120.7(6) | 109.51(13) |
| O(6)-Zn(1)-N(4)     | 104.7(6) | 113.03(12) |
| N(3)#2-Zn(1)-N(4)   | 105.2(7) | 104.46(13) |

Symmetry transformations used to generate equivalent atoms:

(S)-1: #1 x, y, z, #2 -y, x-y, 2/3+z, #3 -x+y, -x, 1/3+z, #4 x-y, -y, 1/3-z, #5 -x, -x+y, 2/3-z, #6 y, x, -z

(R)-1: #1 x, y, z, #2 -y, x-y, z+1/3, #3 -x+y, -x, z+2/3, #4 y, x, -z, #5 x-y, -y, -z+2/3, #6 -x, -x+y, -z+1/3

**5. Figures S1. <sup>1</sup>HNMR of L-Me<sub>2</sub> and H<sub>2</sub>L**

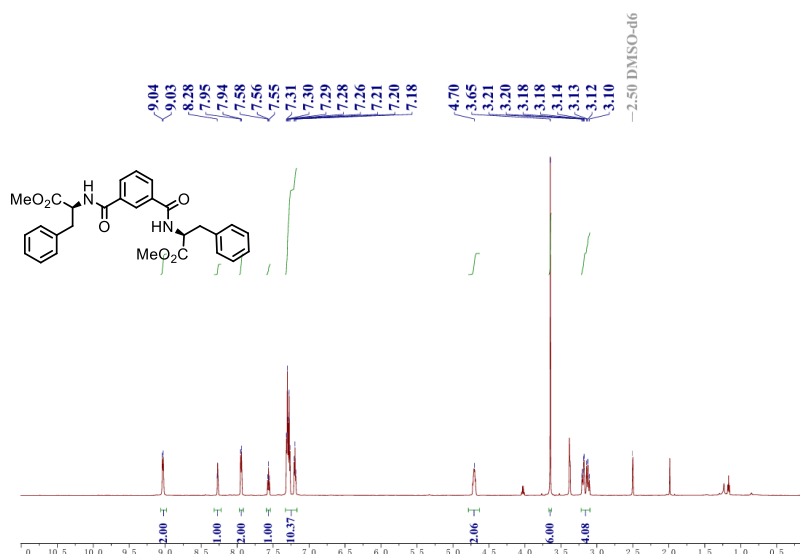

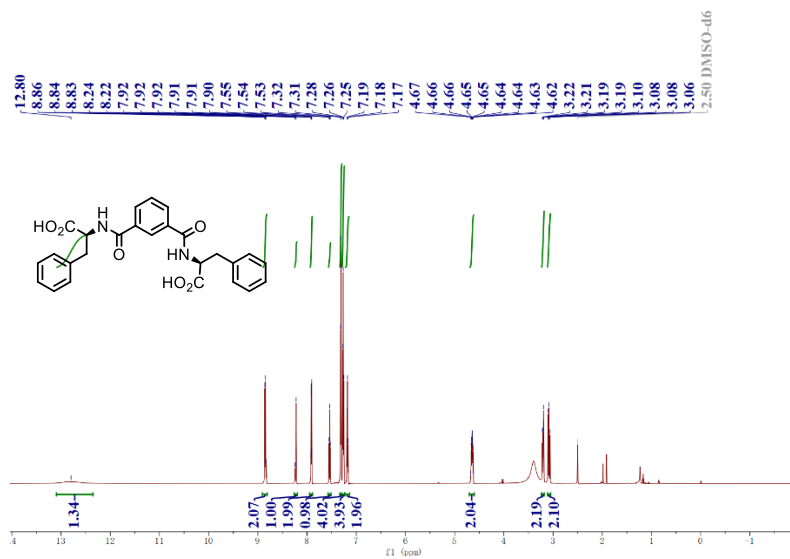

**6. Figures S2-S4. Additional X-ray crystallographic structure of (S)-1.**

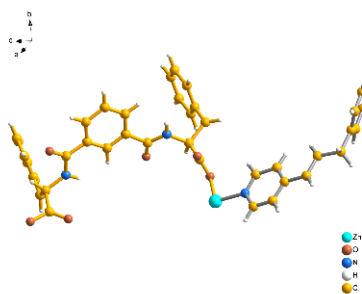

**Figure S2.** Asymmetric unit of (S)-1.

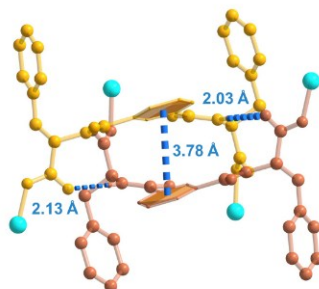

**Figure S3.** N-H...O hydrogen bonds and  $\pi$ ... $\pi$  stackings between the adjacent  $3_2$  helical chains.

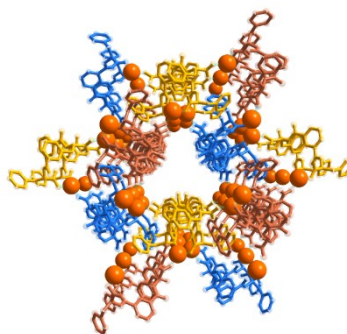

**Figure S4.** Helical nanochannels assembled from six  $3_2$  helices via non-covalent interactions.

7. Figure S5. Adsorption of 4-chloroisatin by (*S*)-1 monitored by UV-Vis

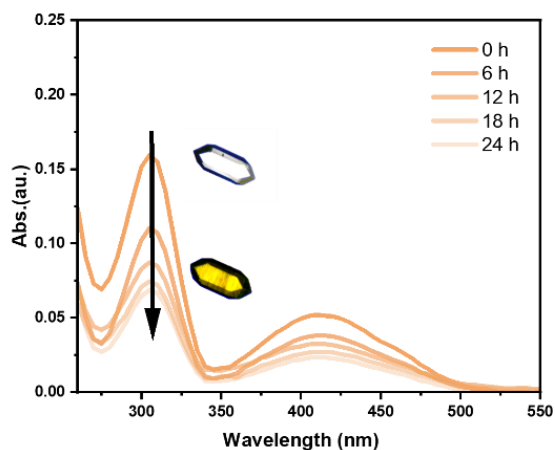

8. Figure S6. HPLC spectra of SO resolved by (*S*)-1 in different solvents (in Table 1).

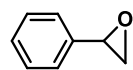

Chiral HPLC analysis: Daicel Chiralce IC: hexane/*i*-PrOH =88/12; flow rate =1.0 mL/min; 220 nm.

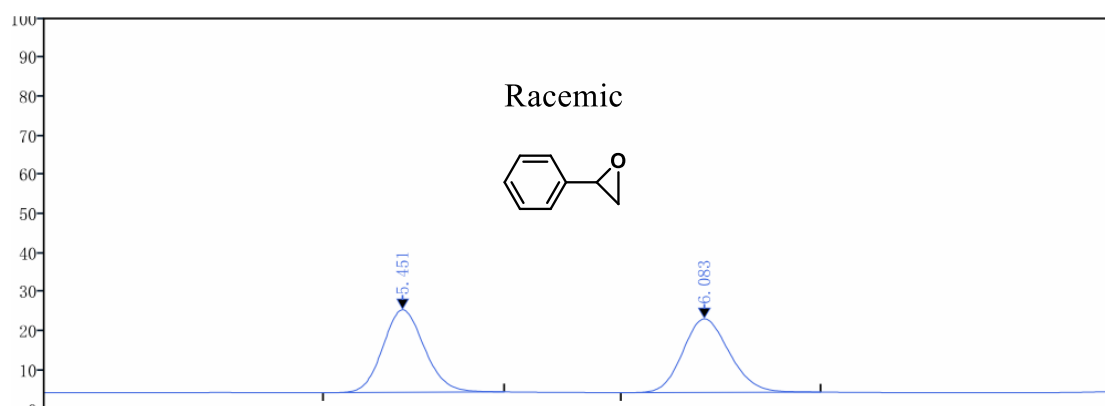

| Serial Number | Type | Retention Time [min] | Peak Area | Area % |
|---------------|------|----------------------|-----------|--------|
| 1             | MM   | 5.451                | 1597.55   | 50.02  |
| 2             | MM   | 6.083                | 1596.26   | 49.98  |
| The Total     |      |                      | 3193.81   |        |

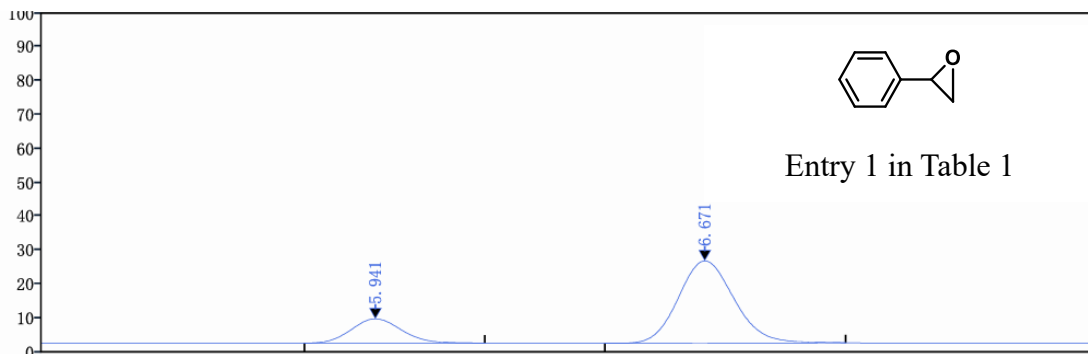

| Serial Number | Type | Retention Time [min] | Peak Area | Area % |
|---------------|------|----------------------|-----------|--------|
| 1             | MM   | 5.941                | 891.81    | 21.15  |
| 2             | MM   | 6.671                | 3324.07   | 78.85  |
| The Total     |      |                      | 4215.88   |        |

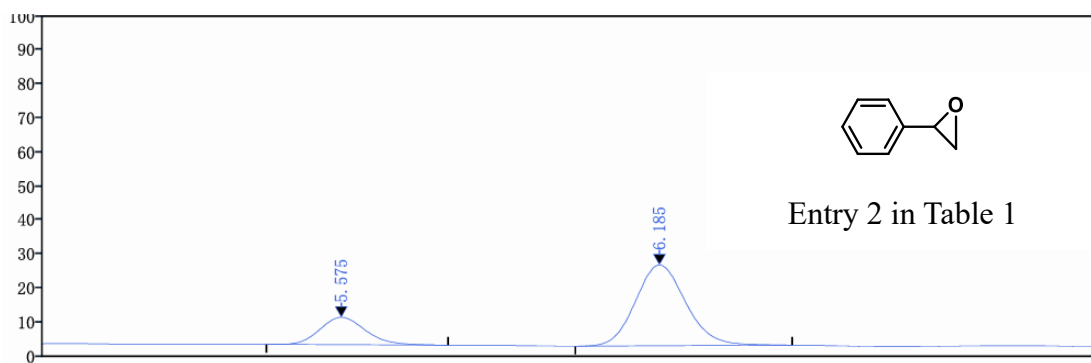

| Serial Number | Type | Retention Time [min] | Peak Area | Area % |
|---------------|------|----------------------|-----------|--------|
| 1             | MM   | 5.575                | 39.5      | 23.44  |
| 2             | MM   | 6.185                | 128.98    | 76.56  |
| The Total     |      |                      | 168.48    |        |

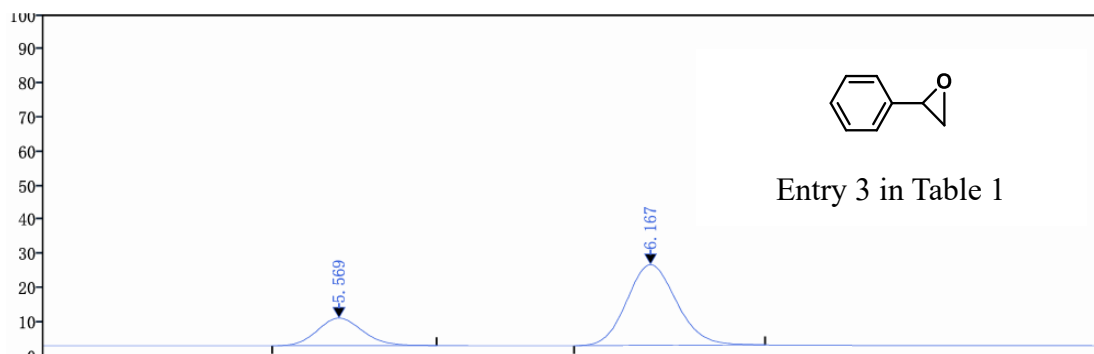

| Serial Number | Type | Retention Time [min] | Peak Area | Area % |
|---------------|------|----------------------|-----------|--------|
| 1             | MM   | 5.569                | 456.81    | 23.58  |
| 2             | MM   | 6.167                | 1480.54   | 76.42  |
| The Total     |      |                      | 1937.35   |        |

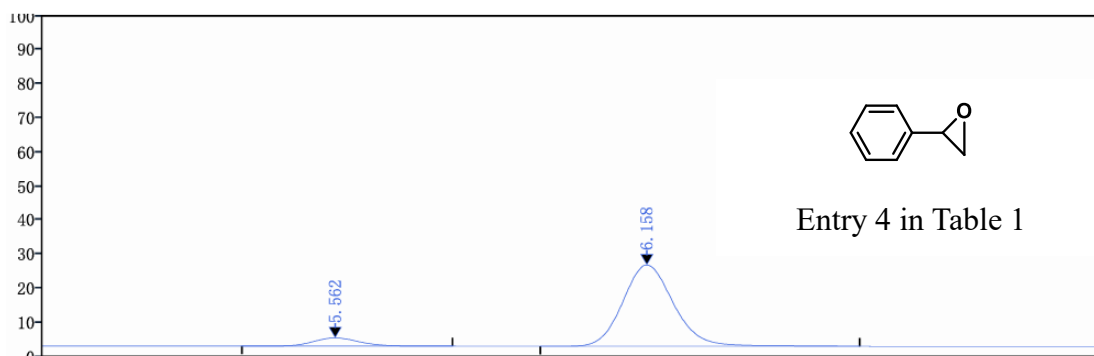

| Serial Number | Type | Retention Time [min] | Peak Area | Area % |
|---------------|------|----------------------|-----------|--------|
| 1             | MM   | 5.562                | 105.07    | 8.17   |
| 2             | MM   | 6.158                | 1180.98   | 91.83  |
| The Total     |      |                      | 1286.05   |        |

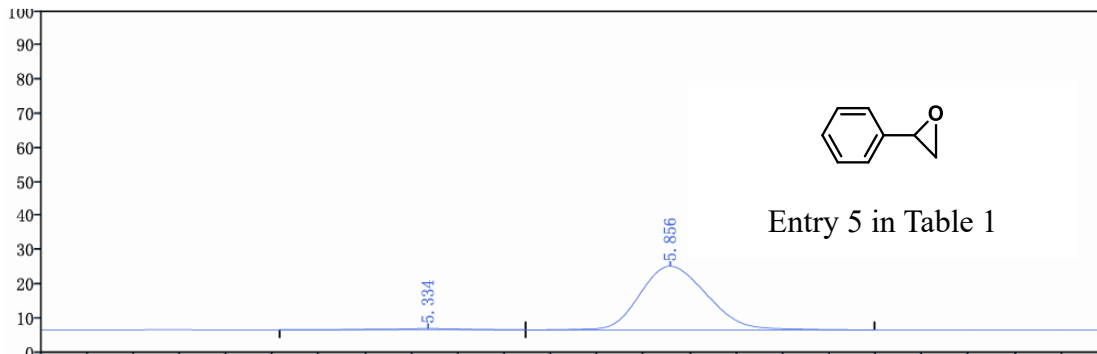

| Serial Number | Type | Retention Time [min] | Peak Area | Area % |
|---------------|------|----------------------|-----------|--------|
| 1             | MM   | 5.334                | 2.64      | 0.30   |
| 2             | MM   | 5.856                | 873.60    | 99.70  |
| The Total     |      |                      | 876.24    |        |

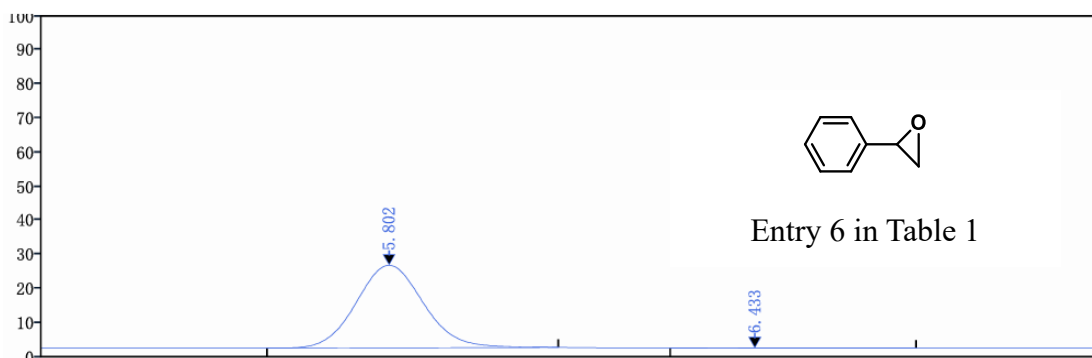

| Serial Number | Type | Retention Time [min] | Peak Area | Area % |
|---------------|------|----------------------|-----------|--------|
| 1             | MM   | 5.802                | 2366.50   | 99.80  |
| 2             | MM   | 6.433                | 4.78      | 0.20   |
| The Total     |      |                      | 2371.28   |        |

9. Figure S7. HPLC spectra of dynamic enantiosorption of (*S*)-1 towards PGE

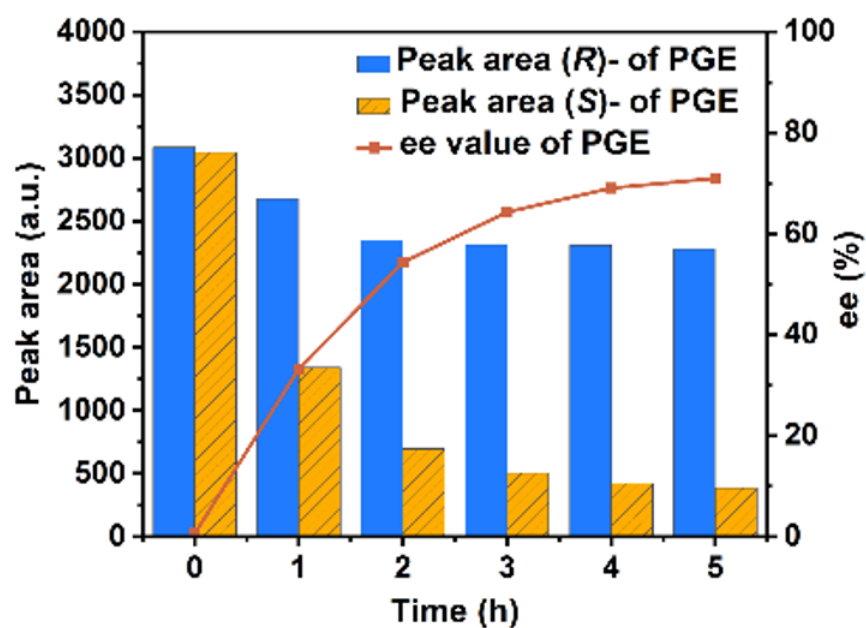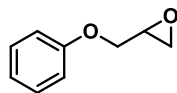

Chiral HPLC analysis: Daicel Chiralce OD-H: hexane/*i*-PrOH =90/10; flow rate =0.8 mL/min; 220 nm;  $t_R = 8.095$  min,  $t_R = 13.390$  min.

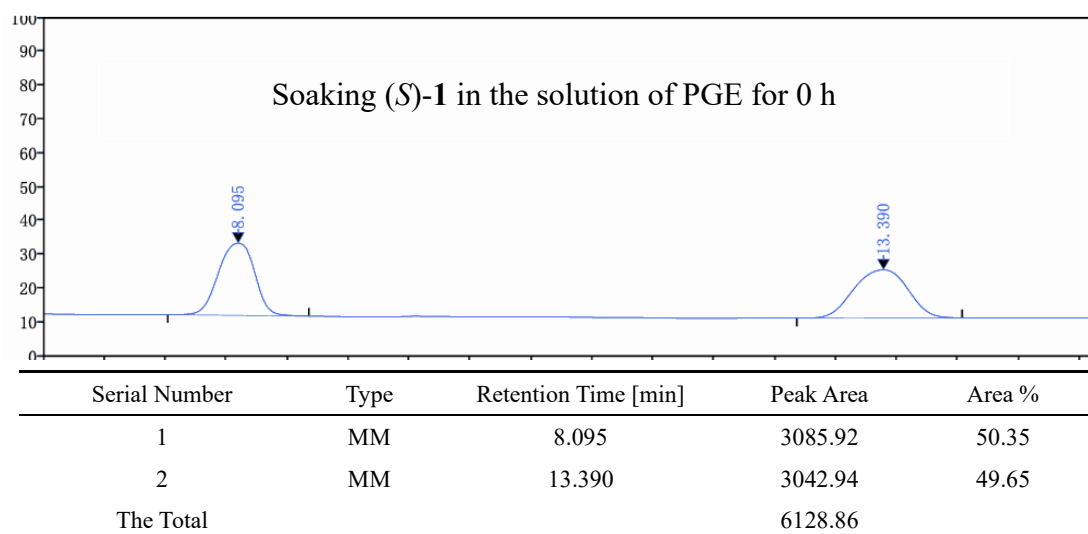

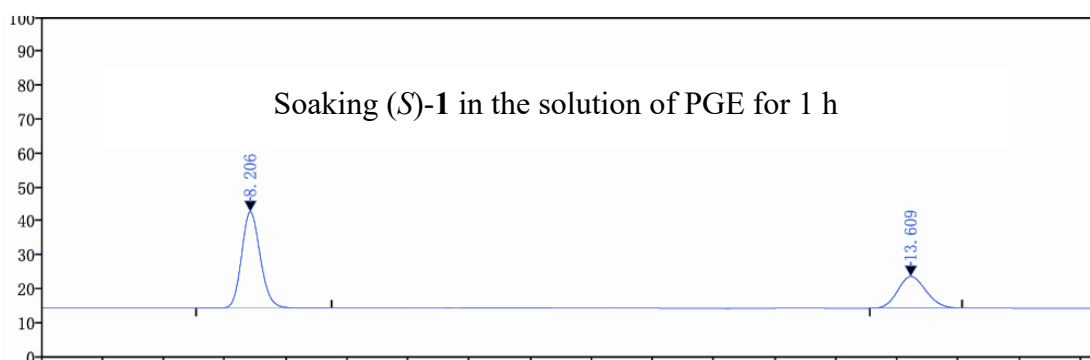

| Serial Number | Type | Retention Time [min] | Peak Area | Area % |
|---------------|------|----------------------|-----------|--------|
| 1             | MM   | 8.206                | 2674.37   | 66.61  |
| 2             | MM   | 13.609               | 1340.68   | 33.39  |
| The Total     |      |                      | 4015.05   |        |

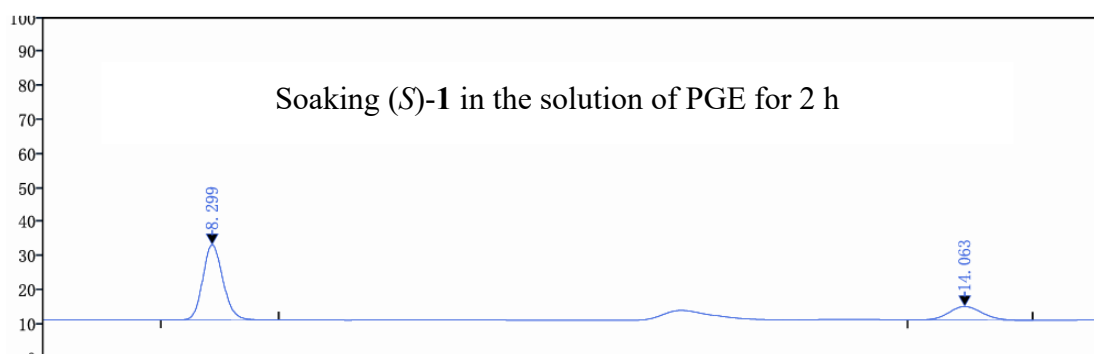

| Serial Number | Type | Retention Time [min] | Peak Area | Area % |
|---------------|------|----------------------|-----------|--------|
| 1             | MM   | 8.299                | 2345.15   | 77.12  |
| 2             | MM   | 14.063               | 695.84    | 22.88  |
| The Total     |      |                      | 3040.99   |        |

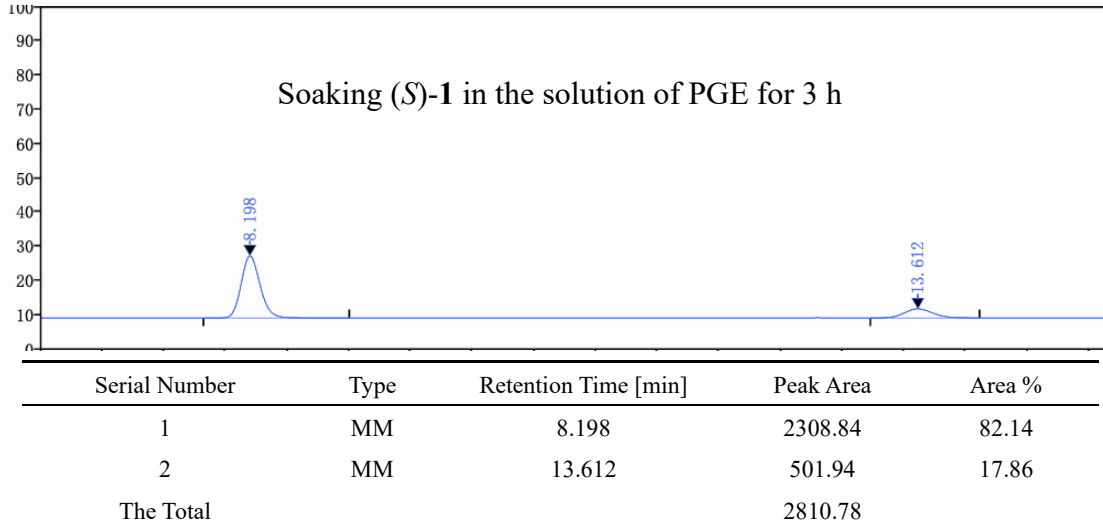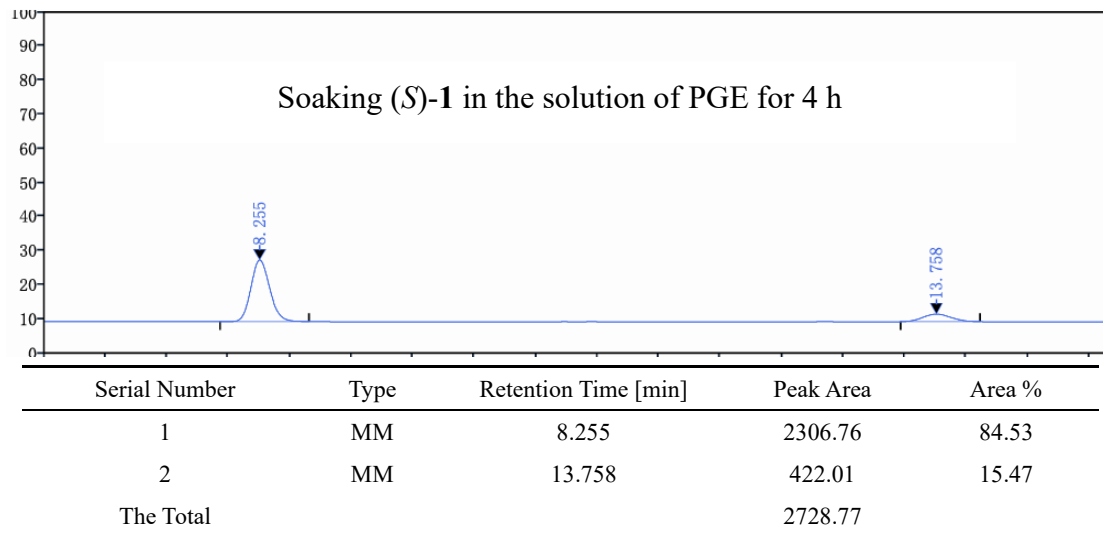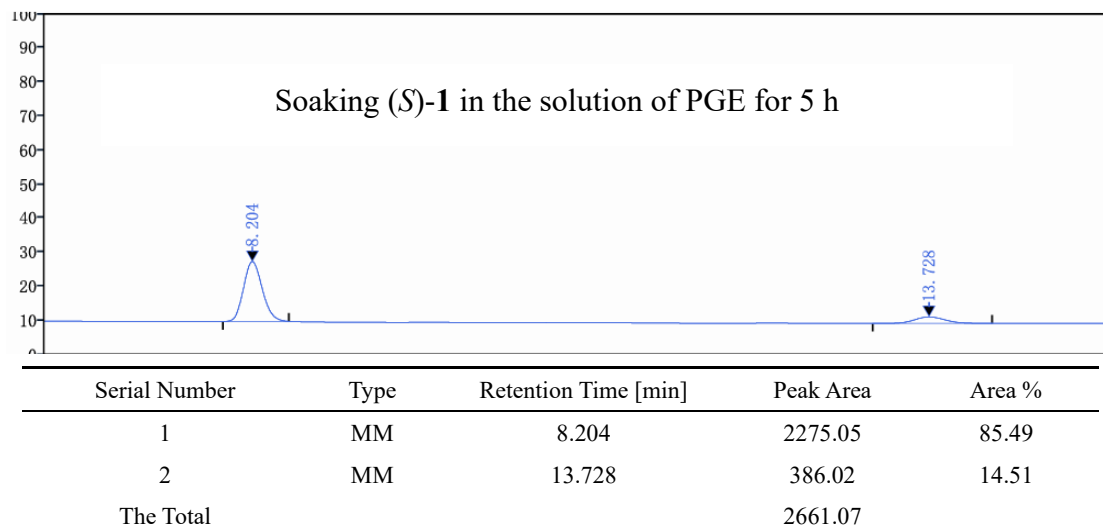

10. Figure S8. HPLC spectra of epoxides (in Figure 4).

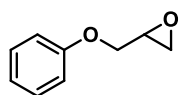

Chiral HPLC analysis: Daicel Chiralce AS-H: hexane/*i*-PrOH =98/2; flow rate =0.8 mL/min; 220 nm;  $t_R = 12.376$  min,  $t_R = 15.708$  min.

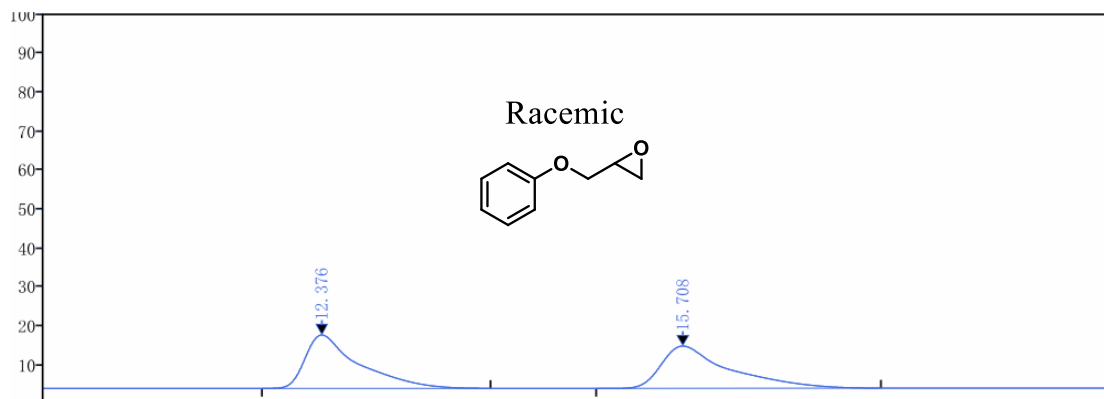

| Serial Number | Type | Retention Time [min] | Peak Area | Area % |
|---------------|------|----------------------|-----------|--------|
| 1             | MM   | 12.376               | 2777.10   | 49.93  |
| 2             | MM   | 15.708               | 2785.04   | 50.07  |
| The Total     |      |                      | 5562.14   |        |

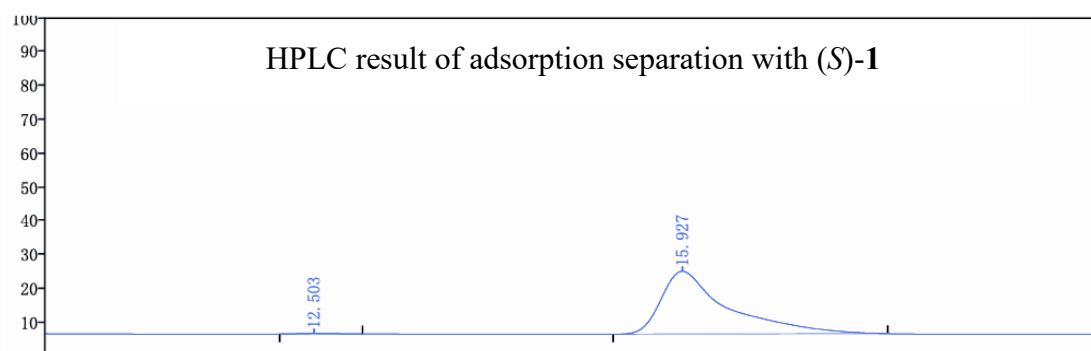

| Serial Number | Type | Retention Time [min] | Peak Area | Area % |
|---------------|------|----------------------|-----------|--------|
| 1             | MM   | 12.503               | 6.70      | 0.41   |
| 2             | MM   | 15.927               | 1609.88   | 99.59  |
| The Total     |      |                      | 1616.58   |        |

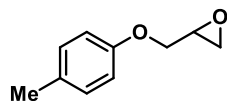

Chiral HPLC analysis: Daicel Chiralce OD: hexane/*i*-PrOH =95/5; flow rate =1.0 mL/min; 220 nm;  $t_R = 8.725$  min,  $t_R = 10.895$  min.

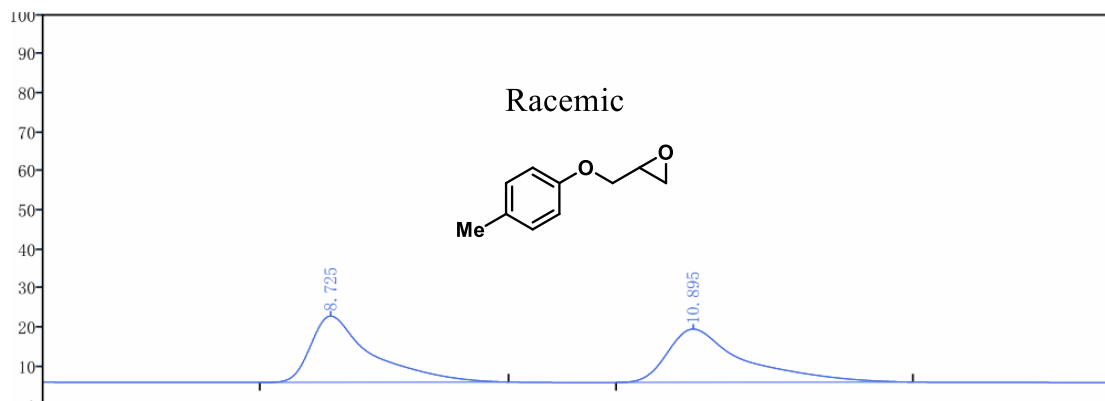

| Serial Number | Type | Retention Time [min] | Peak Area | Area % |
|---------------|------|----------------------|-----------|--------|
| 1             | MM   | 8.725                | 1467.44   | 49.84  |
| 2             | MM   | 10.895               | 1476.88   | 50.16  |
| The Total     |      |                      | 2944.32   |        |

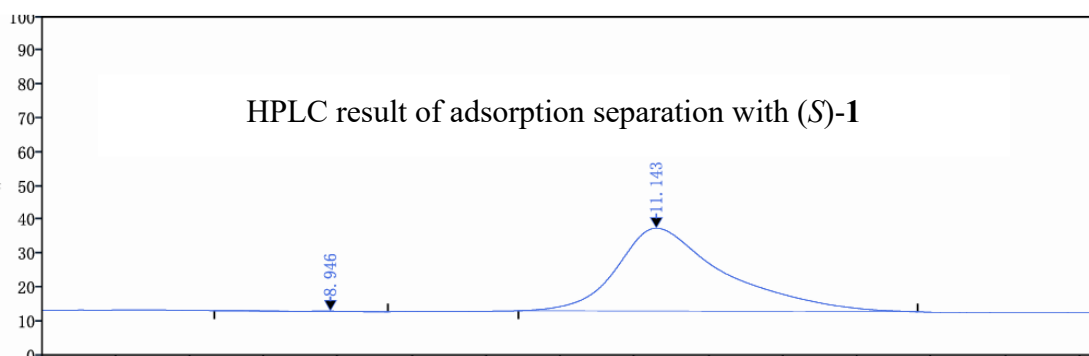

| Serial Number | Type | Retention Time [min] | Peak Area | Area % |
|---------------|------|----------------------|-----------|--------|
| 1             | MM   | 8.946                | 0.13      | 0.02   |
| 2             | MM   | 11.143               | 841.57    | 99.98  |
| The Total     |      |                      | 841.70    |        |

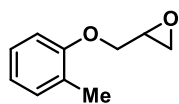

Chiral HPLC analysis: Daicel Chiralce IA: hexane/*i*-PrOH =98/2; flow rate =1.0 mL/min; 220 nm;  $t_R = 7.047$  min,  $t_R = 9.953$  min.

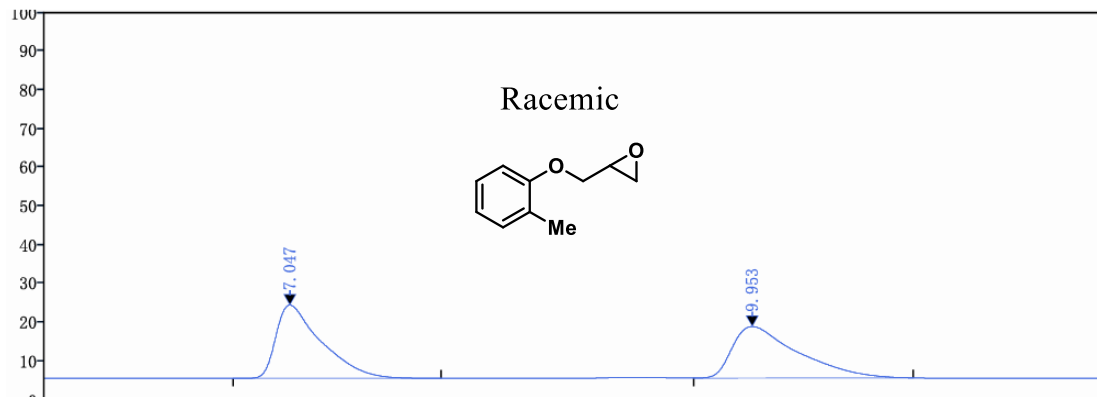

| Serial Number | Type | Retention Time [min] | Peak Area | Area % |
|---------------|------|----------------------|-----------|--------|
| 1             | MM   | 7.047                | 39843.52  | 49.52  |
| 2             | MM   | 9.953                | 40612.18  | 50.48  |
| The Total     |      |                      | 80455.70  |        |

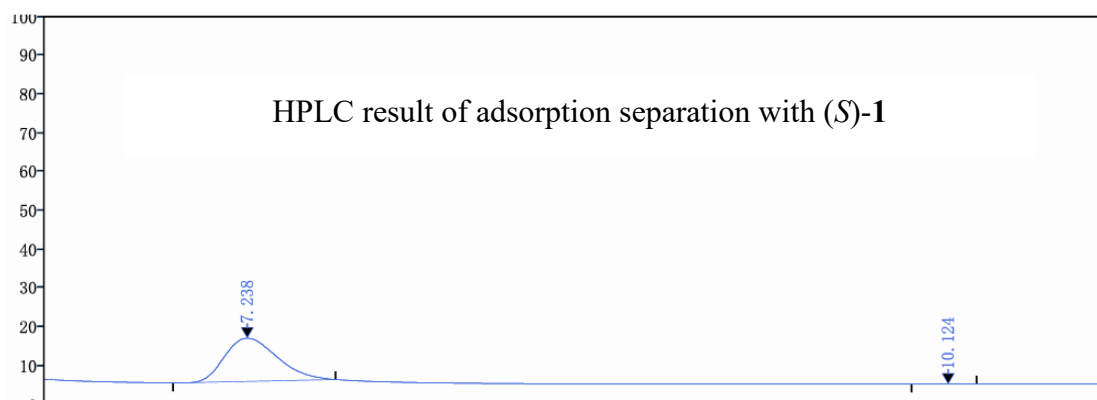

| Serial Number | Type | Retention Time [min] | Peak Area | Area % |
|---------------|------|----------------------|-----------|--------|
| 1             | MM   | 7.238                | 551.63    | 100.00 |
| 2             | MM   | 10.124               | 0.00      | 0.00   |
| The Total     |      |                      | 551.63    |        |

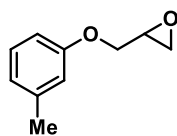

Chiral HPLC analysis: Daicel Chiralce AS: hexane/*i*-PrOH =98/2; flow rate =1.0

mL/min; 220 nm;  $t_R$  =8.028 min,  $t_R$  = 9.794 min.

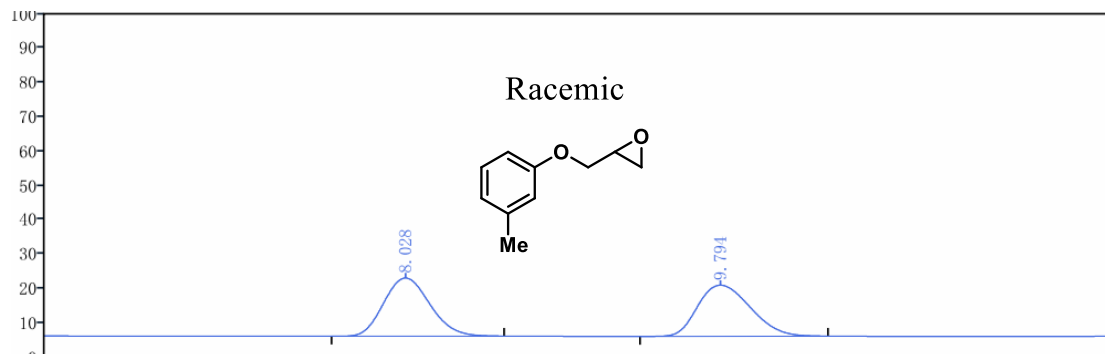

| Serial Number | Type | Retention Time [min] | Peak Area | Area % |
|---------------|------|----------------------|-----------|--------|
| 1             | MM   | 8.028                | 9378.66   | 49.98  |
| 2             | MM   | 9.794                | 9384.59   | 50.02  |
| The Total     |      |                      | 18763.25  |        |

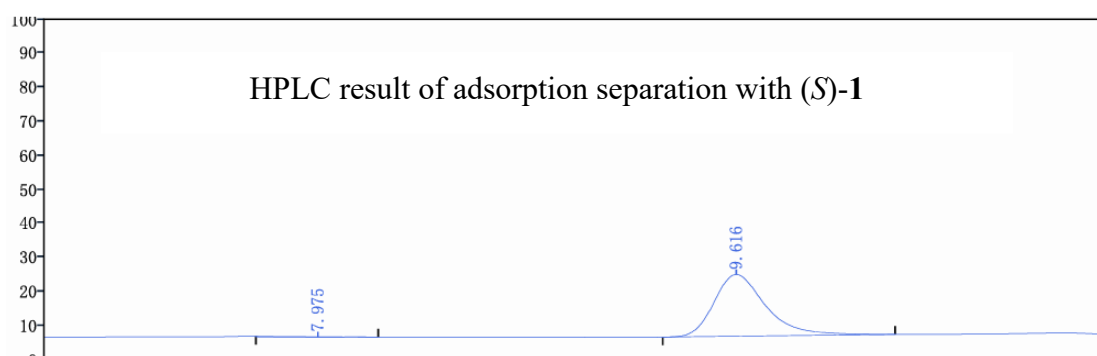

| Serial Number | Type | Retention Time [min] | Peak Area | Area % |
|---------------|------|----------------------|-----------|--------|
| 1             | MM   | 7.975                | 0.51      | 0.09   |
| 2             | MM   | 9.616                | 575.11    | 99.91  |
| The Total     |      |                      | 575.62    |        |

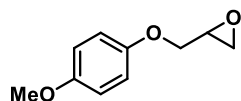

Chiral HPLC analysis: Daicel Chiralce OD: hexane/*i*-PrOH =90/10; flow rate =1.0 mL/min; 254 nm;  $t_R = 8.066$  min,  $t_R = 9.926$  min.

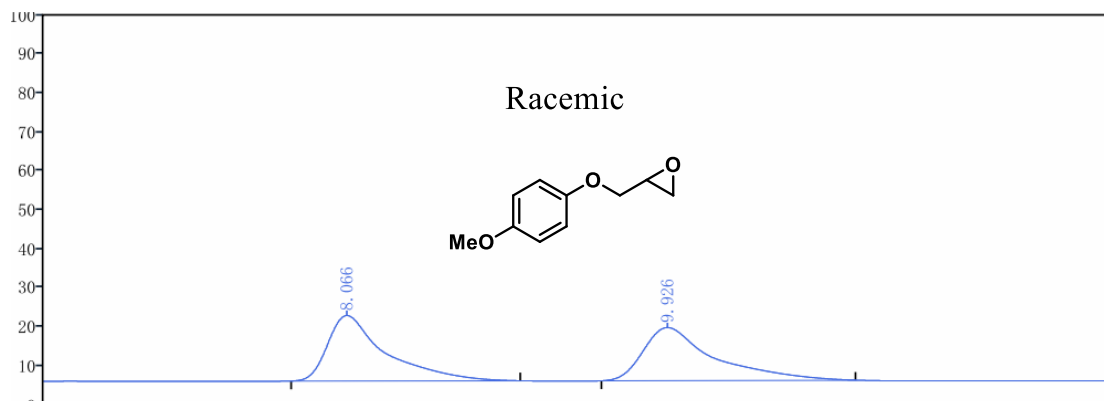

| Serial Number | Type | Retention Time [min] | Peak Area | Area % |
|---------------|------|----------------------|-----------|--------|
| 1             | MM   | 8.066                | 1488.37   | 50.27  |
| 2             | MM   | 9.926                | 1472.50   | 49.73  |
| The Total     |      |                      | 2960.87   |        |

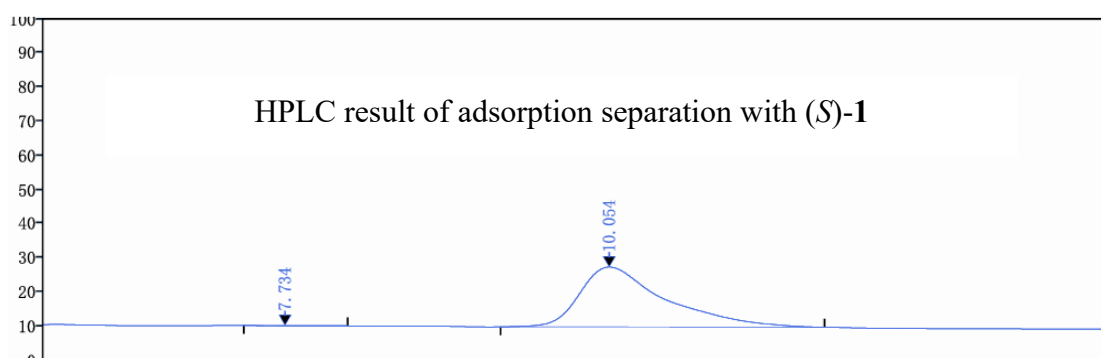

| Serial Number | Type | Retention Time [min] | Peak Area | Area % |
|---------------|------|----------------------|-----------|--------|
| 1             | MM   | 7.734                | 0.56      | 0.10   |
| 2             | MM   | 10.054               | 588.90    | 99.90  |
| The Total     |      |                      | 589.46    |        |

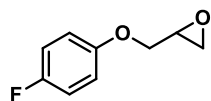

Chiral HPLC analysis: Daicel Chiralce OD: hexane/*i*-PrOH =98/2; flow rate =1.0 mL/min; 220 nm;  $t_R = 8.042$  min,  $t_R = 9.084$  min.

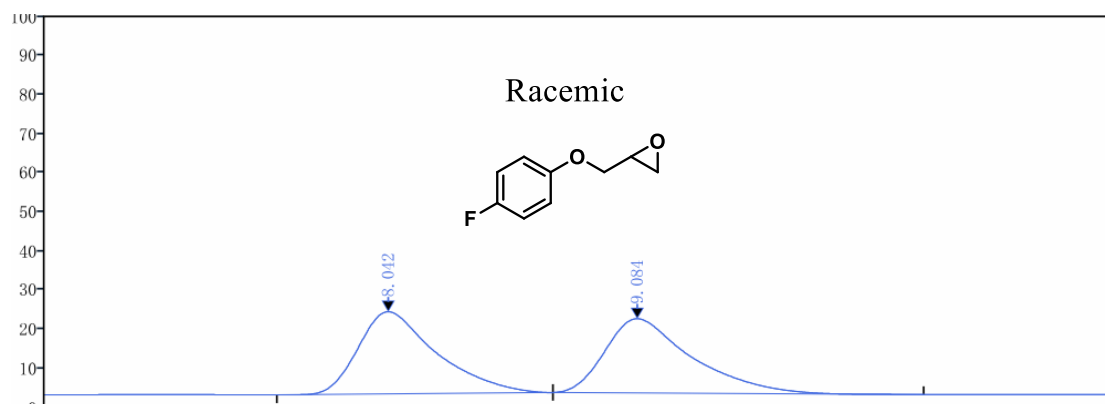

| Serial Number | Type | Retention Time [min] | Peak Area | Area % |
|---------------|------|----------------------|-----------|--------|
| 1             | MM   | 8.042                | 14870.59  | 49.98  |
| 2             | MM   | 9.084                | 14883.19  | 50.02  |
| The Total     |      |                      | 29753.78  |        |

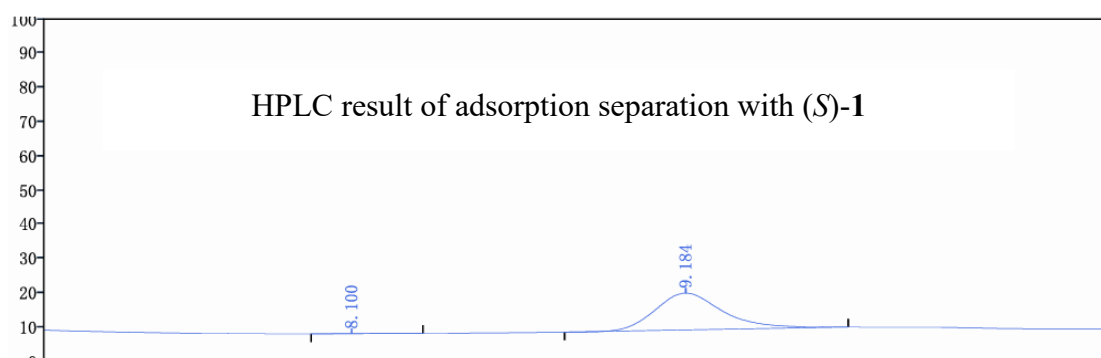

| Serial Number | Type | Retention Time [min] | Peak Area | Area % |
|---------------|------|----------------------|-----------|--------|
| 1             | MM   | 8.100                | 0.39      | 0.06   |
| 2             | MM   | 9.184                | 694.13    | 99.94  |
| The Total     |      |                      | 694.52    |        |

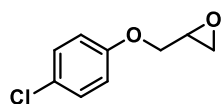

Chiral HPLC analysis: Daicel Chiralce OJ: hexane/*i*-PrOH =95/5; flow rate =1.0 mL/min; 220 nm;  $t_R = 16.754$  min,  $t_R = 23.471$  min.

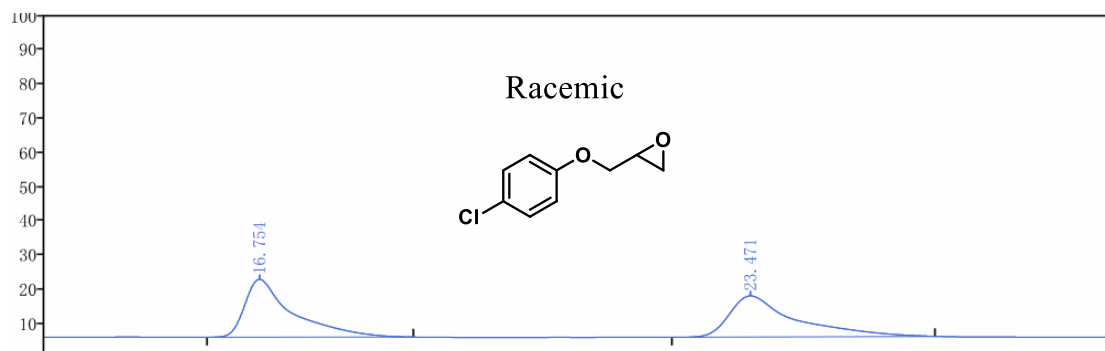

| Serial Number | Type | Retention Time [min] | Peak Area | Area % |
|---------------|------|----------------------|-----------|--------|
| 1             | MM   | 16.754               | 975.50    | 50.36  |
| 2             | MM   | 23.471               | 961.72    | 49.64  |
| The Total     |      |                      | 1937.22   |        |

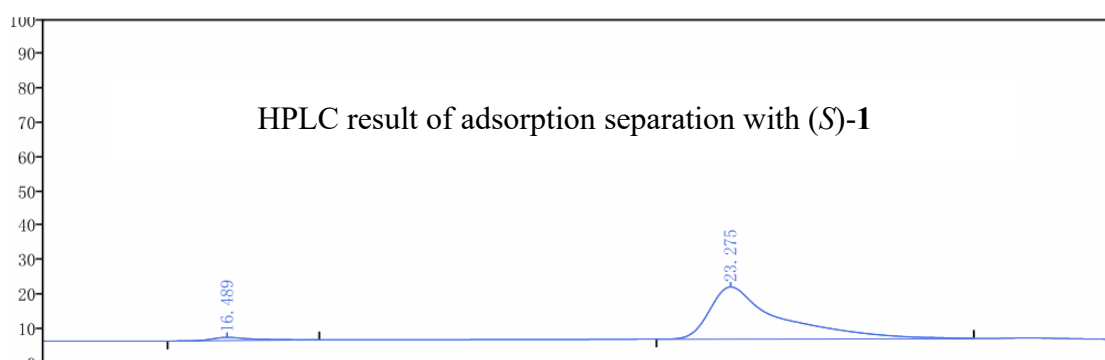

| Serial Number | Type | Retention Time [min] | Peak Area | Area % |
|---------------|------|----------------------|-----------|--------|
| 1             | MM   | 16.489               | 0.69      | 0.12   |
| 2             | MM   | 23.275               | 580.15    | 99.88  |
| The Total     |      |                      | 580.84    |        |

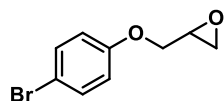

Chiral HPLC analysis: Daicel Chiralce OD: hexane/*i*-PrOH =90/10; flow rate =1.0 mL/min; 230 nm;  $t_R = 9.845$  min,  $t_R = 12.527$  min.

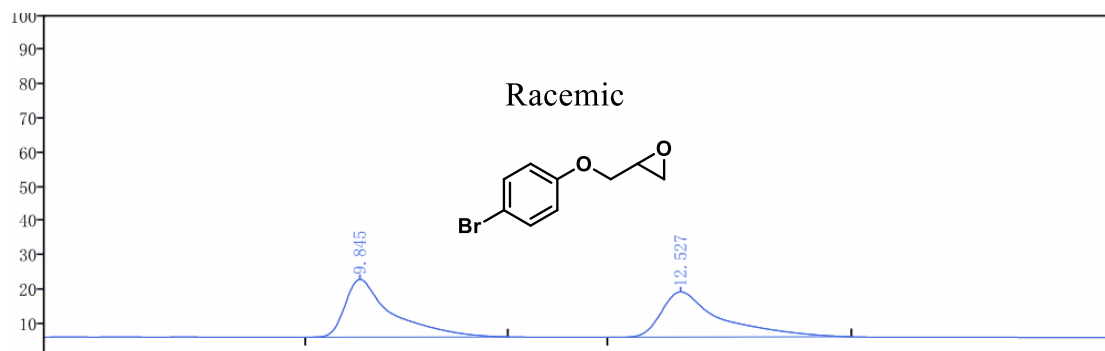

| Serial Number | Type | Retention Time [min] | Peak Area | Area % |
|---------------|------|----------------------|-----------|--------|
| 1             | MM   | 9.845                | 1023.62   | 50.16  |
| 2             | MM   | 12.527               | 1016.95   | 49.84  |
| The Total     |      |                      | 2040.57   |        |

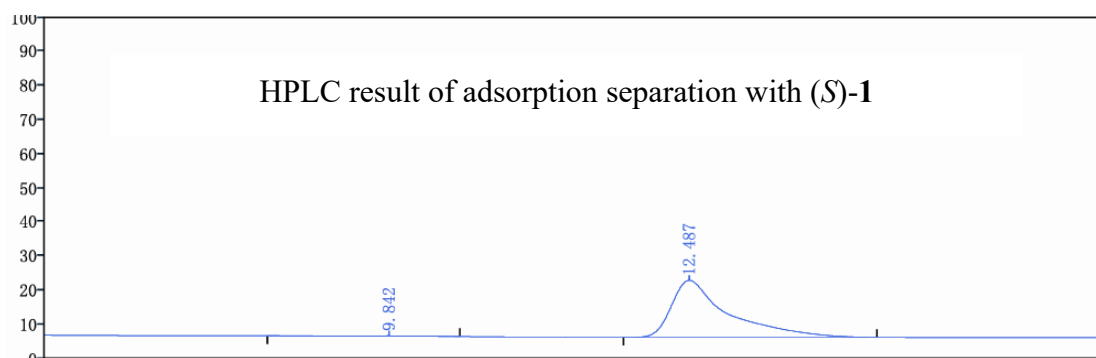

| Serial Number | Type | Retention Time [min] | Peak Area | Area % |
|---------------|------|----------------------|-----------|--------|
| 1             | MM   | 9.842                | 5.30      | 0.57   |
| 2             | MM   | 12.487               | 920.68    | 99.43  |
| The Total     |      |                      | 925.98    |        |

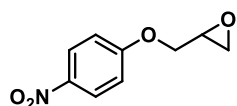

Chiral HPLC analysis: Daicel Chiralce AD: hexane/*i*-PrOH =90/10; flow rate =1.0 mL/min; 218 nm;  $t_R = 14.106$  min,  $t_R = 18.481$  min.

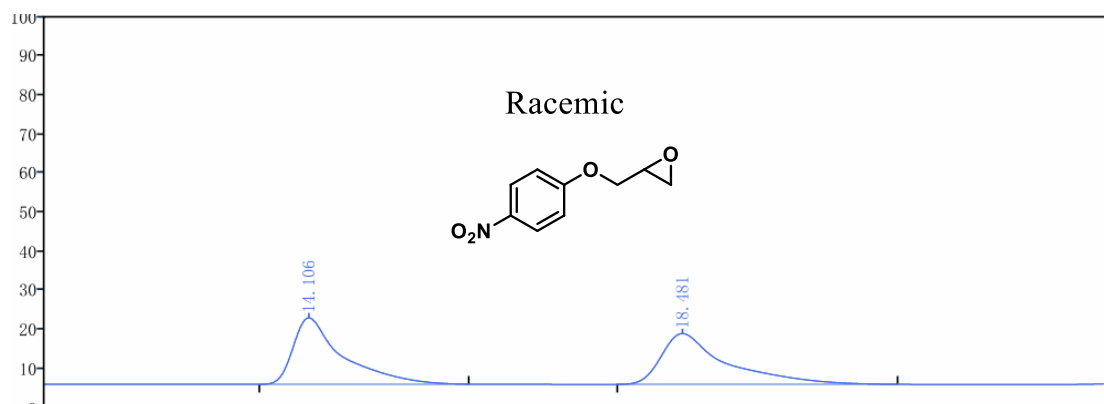

| Serial Number | Type | Retention Time [min] | Peak Area | Area % |
|---------------|------|----------------------|-----------|--------|
| 1             | MM   | 14.106               | 2741.11   | 49.83  |
| 2             | MM   | 18.481               | 2759.56   | 50.17  |
| The Total     |      |                      | 5500.67   |        |

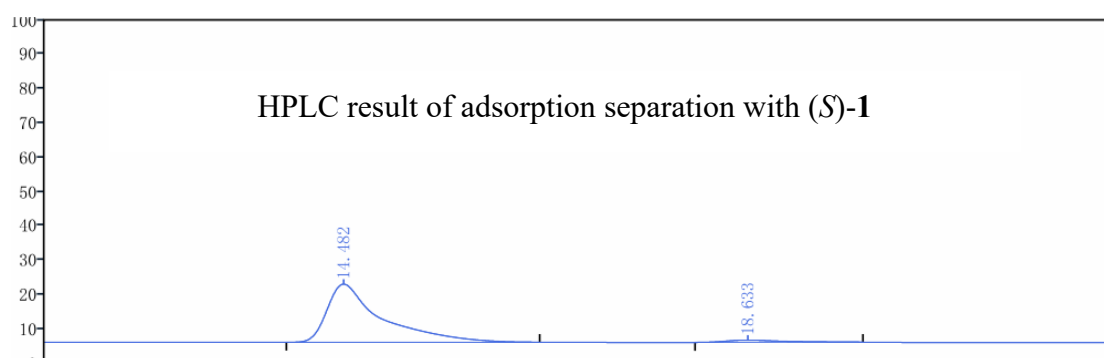

| Serial Number | Type | Retention Time [min] | Peak Area | Area % |
|---------------|------|----------------------|-----------|--------|
| 1             | MM   | 14.482               | 1205.24   | 96.57  |
| 2             | MM   | 18.633               | 42.87     | 3.43   |
| The Total     |      |                      | 1248.11   |        |

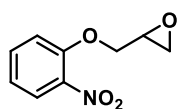

Chiral HPLC analysis: Daicel Chiralce IA: hexane/*i*-PrOH =95/5; flow rate =1.0 mL/min; 220 nm;  $t_R = 10.324$  min,  $t_R = 12.738$  min.

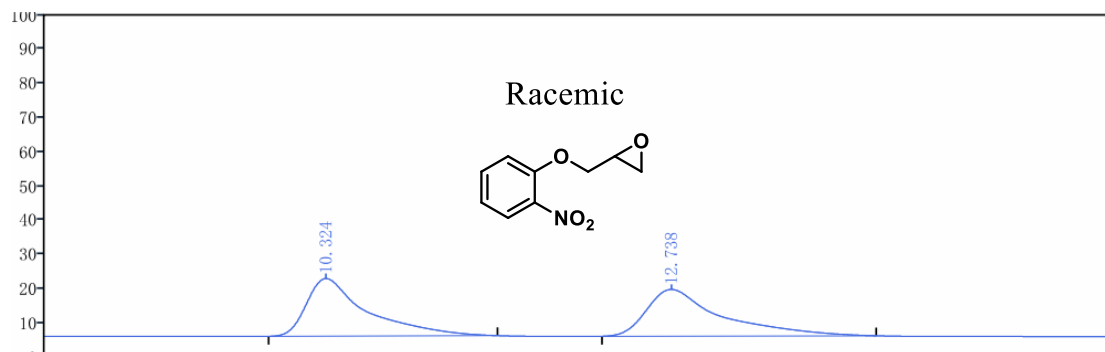

| Serial Number | Type | Retention Time [min] | Peak Area | Area % |
|---------------|------|----------------------|-----------|--------|
| 1             | MM   | 10.324               | 1754.72   | 50.01  |
| 2             | MM   | 12.738               | 1753.70   | 49.99  |
| The Total     |      |                      | 3508.42   |        |

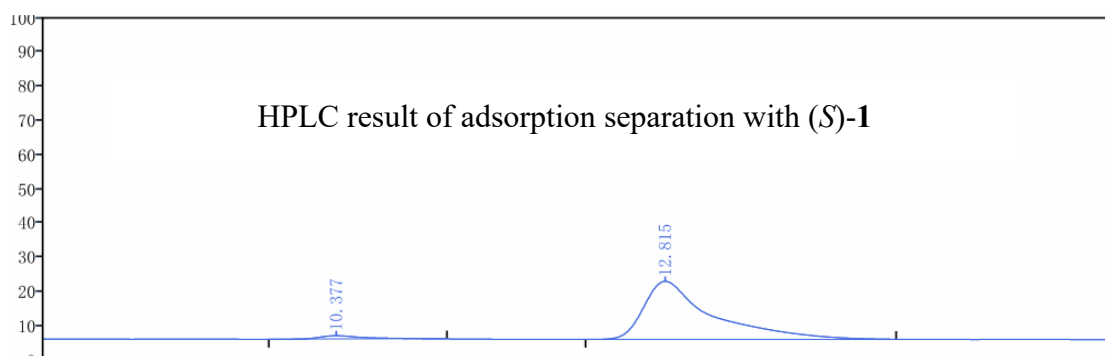

| Serial Number | Type | Retention Time [min] | Peak Area | Area % |
|---------------|------|----------------------|-----------|--------|
| 1             | MM   | 10.377               | 29.70     | 3.01   |
| 2             | MM   | 12.815               | 955.96    | 96.99  |
| The Total     |      |                      | 985.66    |        |

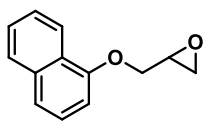

Chiral HPLC analysis: Daicel Chiralce AS: hexane/*i*-PrOH =98/2; flow rate =1.0

mL/min; 220 nm;  $t_R = 11.143$  min,  $t_R = 13.366$  min.

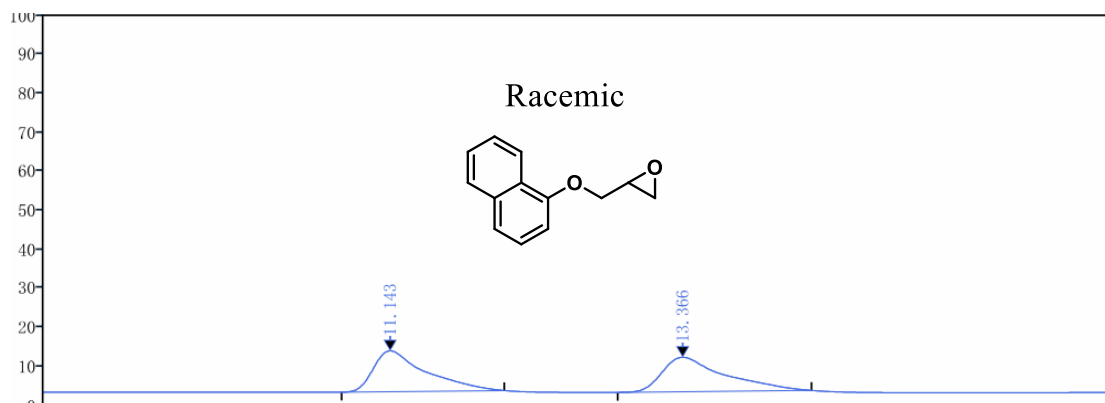

| Serial Number | Type | Retention Time [min] | Peak Area | Area % |
|---------------|------|----------------------|-----------|--------|
| 1             | MM   | 11.143               | 2028.51   | 49.98  |
| 2             | MM   | 13.366               | 2030.02   | 50.02  |
| The Total     |      |                      | 4058.53   |        |

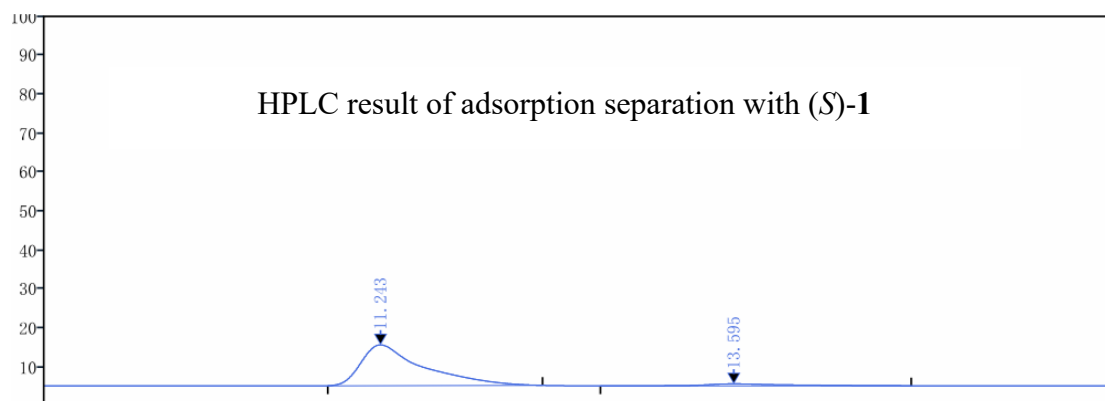

| Serial Number | Type | Retention Time [min] | Peak Area | Area % |
|---------------|------|----------------------|-----------|--------|
| 1             | MM   | 11.243               | 1264.28   | 94.07  |
| 2             | MM   | 13.595               | 79.66     | 5.93   |
| The Total     |      |                      | 1343.94   |        |

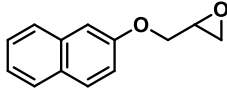

Chiral HPLC analysis: Daicel Chiralce OJ: hexane/*i*-PrOH =70/30; flow rate =1.0 mL/min; 254 nm;  $t_R = 11.402$  min,  $t_R = 14.101$  min.

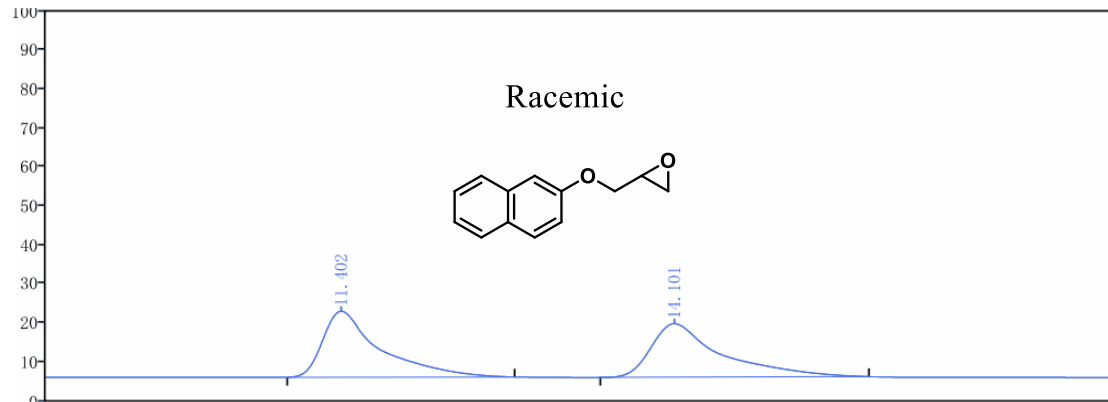

| Serial Number | Type | Retention Time [min] | Peak Area | Area % |
|---------------|------|----------------------|-----------|--------|
| 1             | MM   | 11.402               | 1625.14   | 50.13  |
| 2             | MM   | 14.101               | 1616.72   | 49.87  |
| The Total     |      |                      | 3241.86   |        |

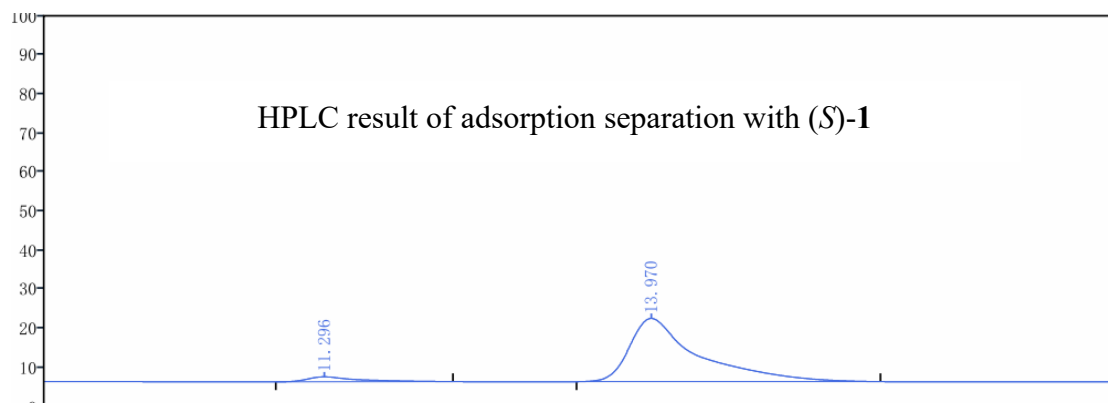

| Serial Number | Type | Retention Time [min] | Peak Area | Area % |
|---------------|------|----------------------|-----------|--------|
| 1             | MM   | 11.296               | 64.83     | 5.47   |
| 2             | MM   | 13.970               | 1121.42   | 94.53  |
| The Total     |      |                      | 1186.25   |        |

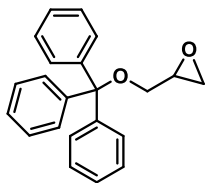

Chiral HPLC analysis: Daicel Chiralce OD: hexane/*i*-PrOH =95/5; flow rate =1.0 mL/min; 254 nm;  $t_R = 10.833$  min,  $t_R = 13.379$  min.

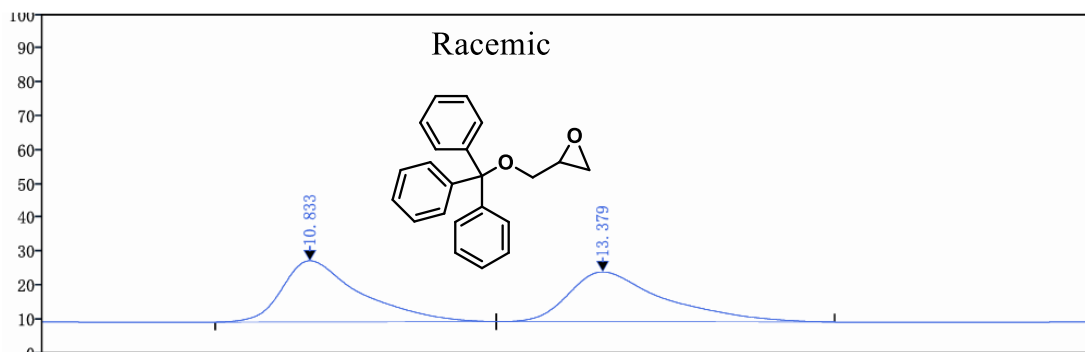

| Serial Number | Type | Retention Time [min] | Peak Area | Area % |
|---------------|------|----------------------|-----------|--------|
| 1             | MM   | 10.833               | 2391.73   | 50.19  |
| 2             | MM   | 13.379               | 2373.58   | 49.81  |
| The Total     |      |                      | 4765.31   |        |

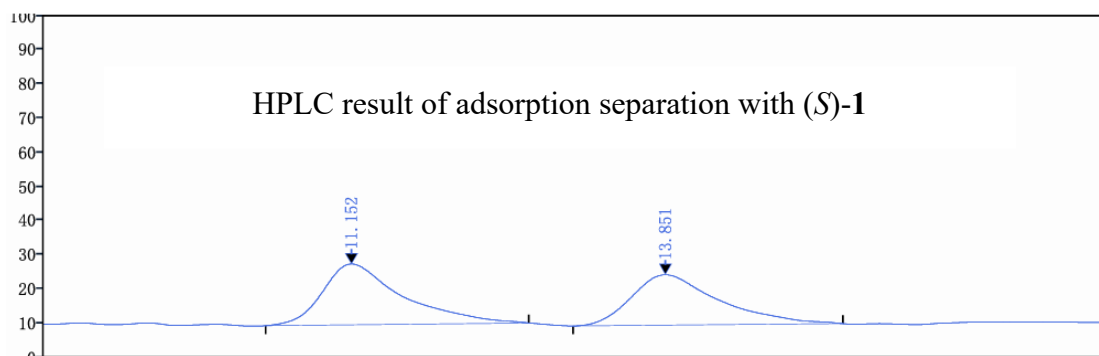

| Serial Number | Type | Retention Time [min] | Peak Area | Area % |
|---------------|------|----------------------|-----------|--------|
| 1             | MM   | 11.152               | 185.78    | 52.47  |
| 2             | MM   | 13.851               | 168.30    | 47.53  |
| The Total     |      |                      | 354.08    |        |

11. Figure S9. HPLC spectra of 1-phenylethanol, phenylethediol, and sec-butylamine

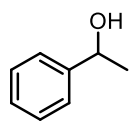

Chiral HPLC analysis: Daicel Chiralce OD-H: hexane/*i*-PrOH =97/3; flow rate

=1.0 mL/min; 220 nm;  $t_R = 11.197$  min,  $t_R = 13.958$  min.

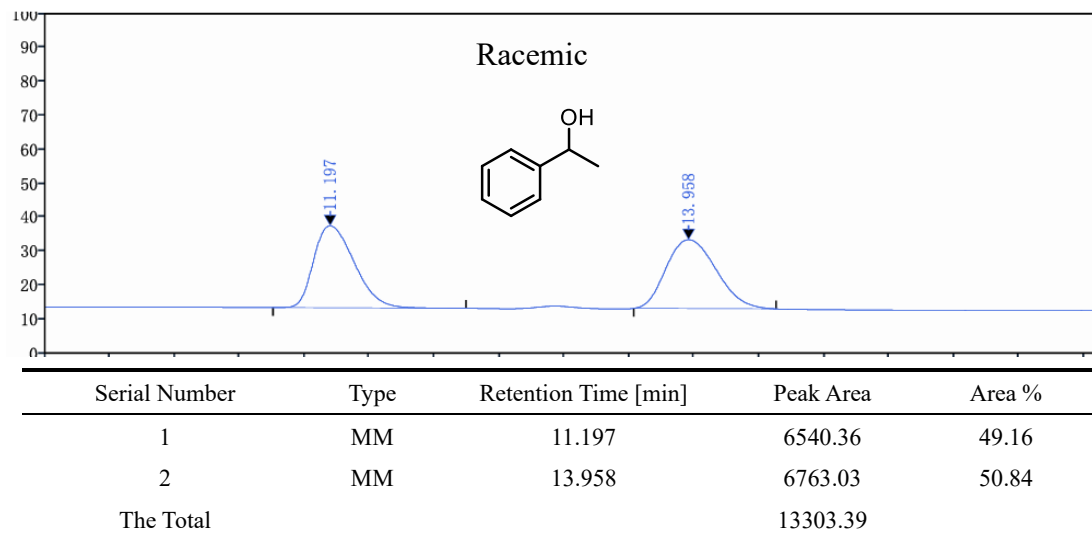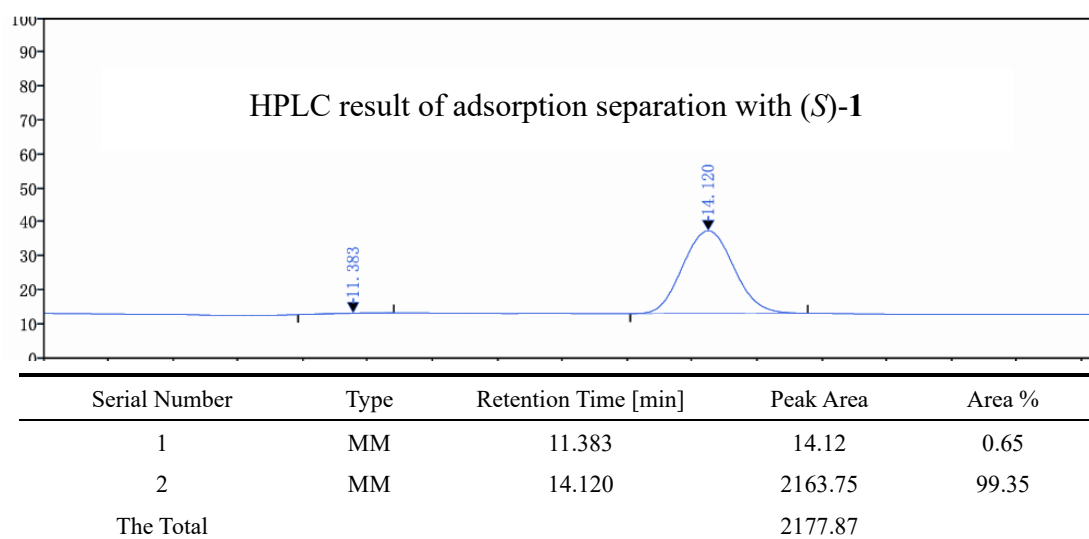

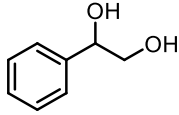

Chiral HPLC analysis: Daicel Chiralce IC: hexane/*i*-PrOH =90/10; flow rate

=1.0 mL/min; 220 nm;  $t_R = 9.466$  min,  $t_R = 10.089$  min.

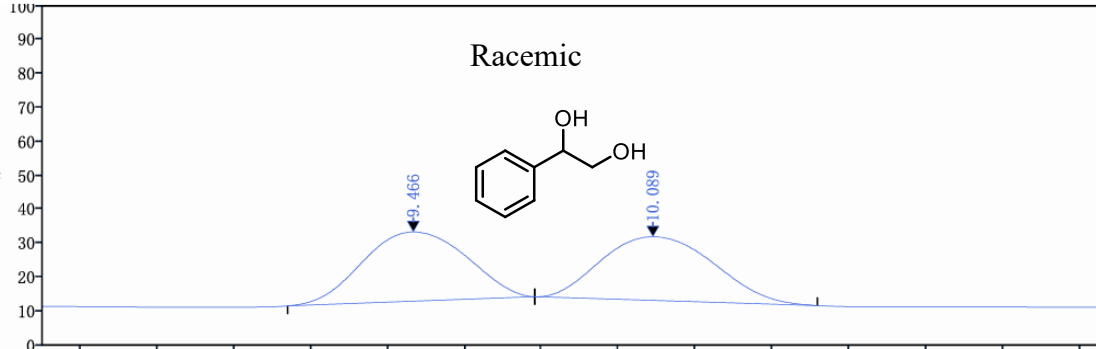

| Serial Number | Type | Retention Time [min] | Peak Area | Area % |
|---------------|------|----------------------|-----------|--------|
| 1             | MM   | 9.466                | 3799.15   | 49.98  |
| 2             | MM   | 10.089               | 3802.28   | 50.02  |
| The Total     |      |                      | 7601.43   |        |

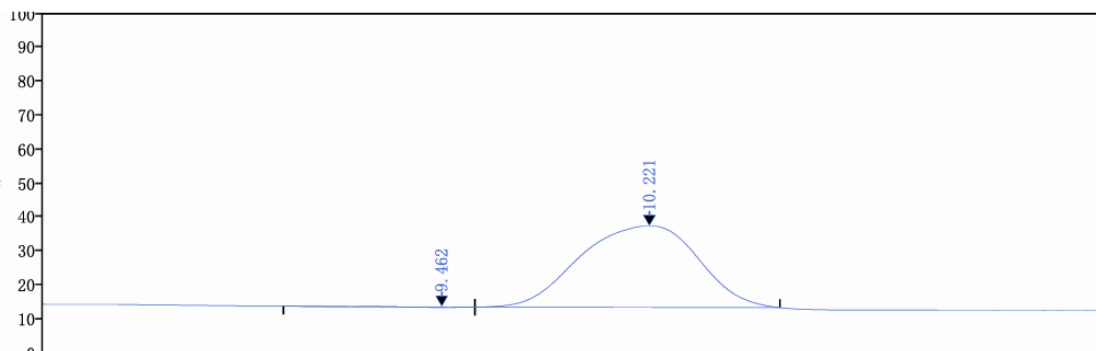

| Serial Number | Type | Retention Time [min] | Peak Area | Area % |
|---------------|------|----------------------|-----------|--------|
| 1             | MM   | 9.462                | 20.31     | 0.29   |
| 2             | MM   | 10.221               | 7059.80   | 99.71  |
| The Total     |      |                      | 7080.11   |        |

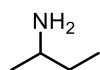

Chiral HPLC analysis: Daicel Chiralce OD-H: hexane/*i*-PrOH =94/6; flow rate =0.8 mL/min; 220 nm;  $t_R = 11.628$  min,  $t_R = 14.485$  min. (acylated with benzoyl chloride)

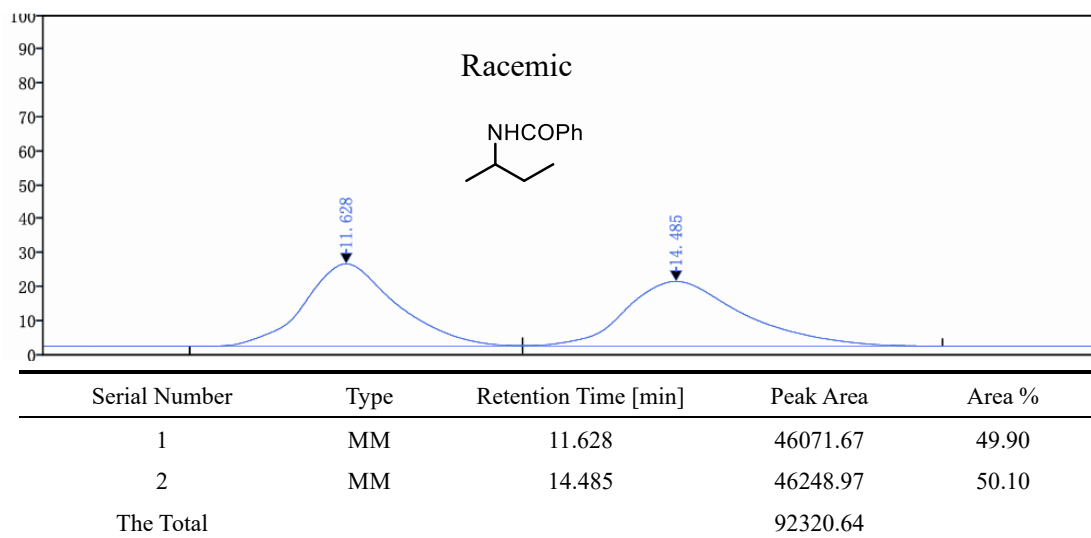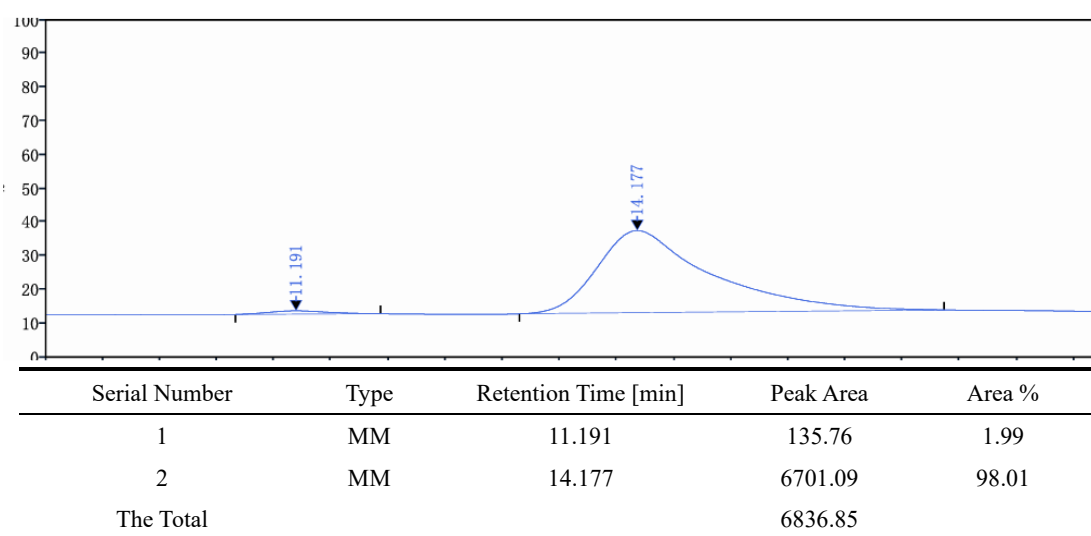

## 12. Figure S10. GC spectra of SO during the cyclic enantioseparation

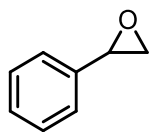

GC analysis: Chirasil-Dex CB; N<sub>2</sub>, flow rate = 1.4906 mL/min, 85°C, t<sub>R</sub> = 26.683 min, t<sub>R</sub> = 29.357 min.

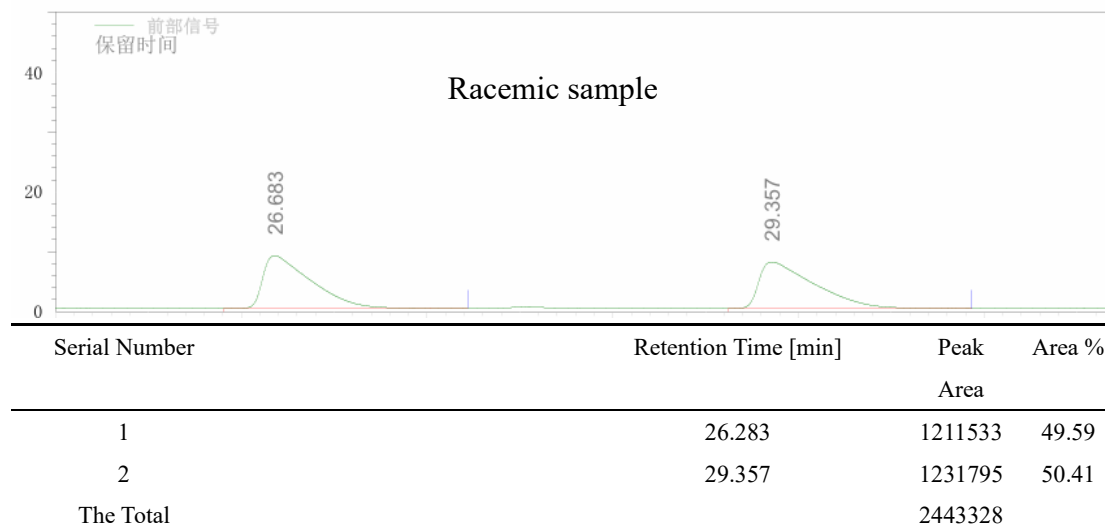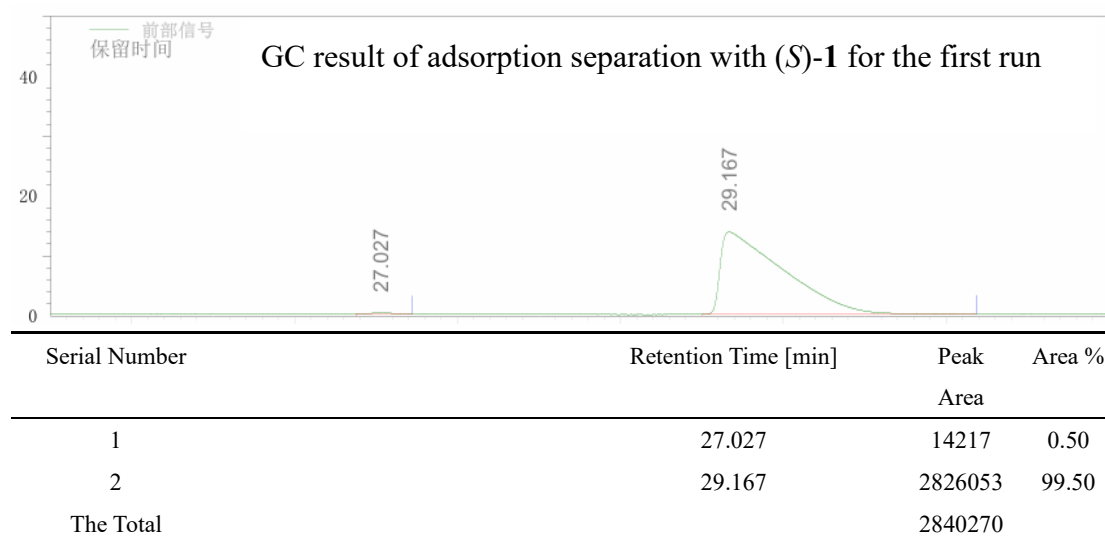

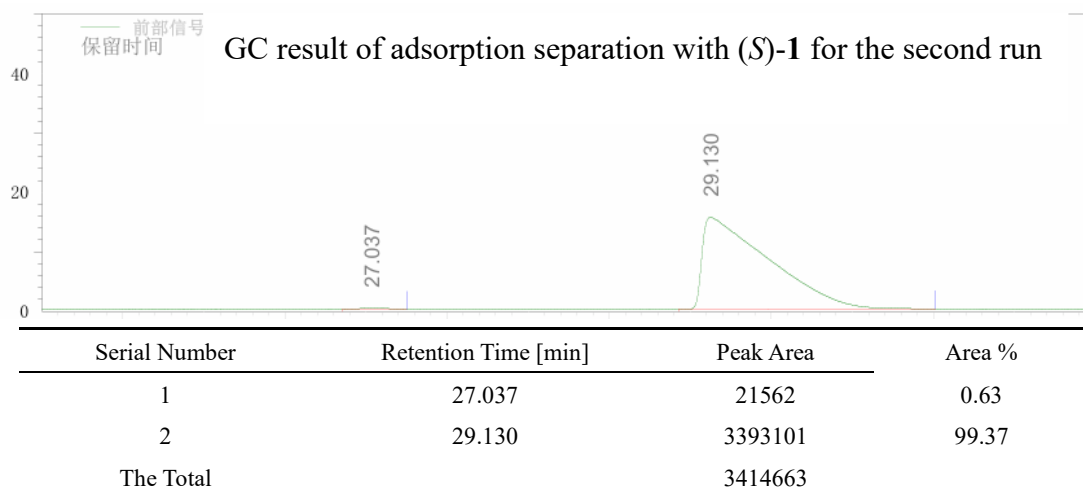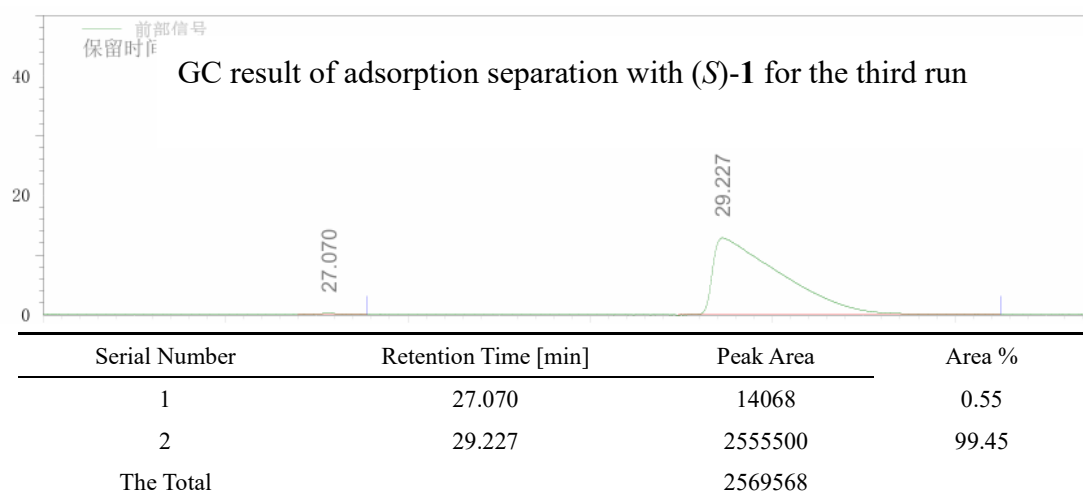

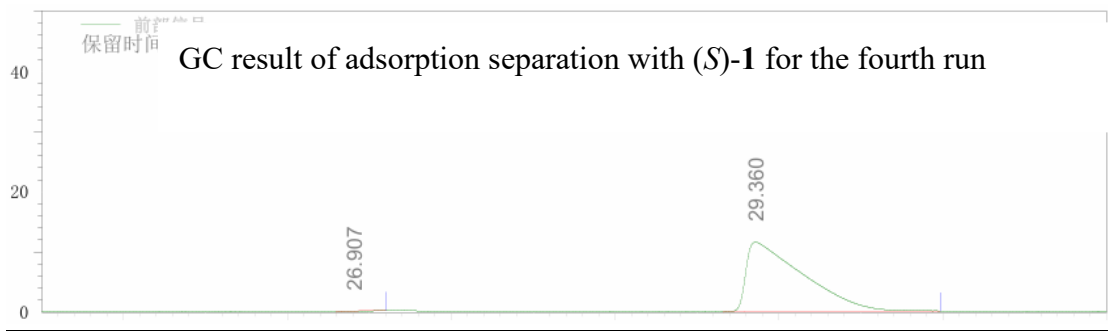

| Serial Number | Retention Time [min] | Peak Area | Area % |
|---------------|----------------------|-----------|--------|
| 1             | 26.907               | 5382      | 0.25   |
| 2             | 29.360               | 2120812   | 99.75  |
| The Total     |                      | 2126194   |        |

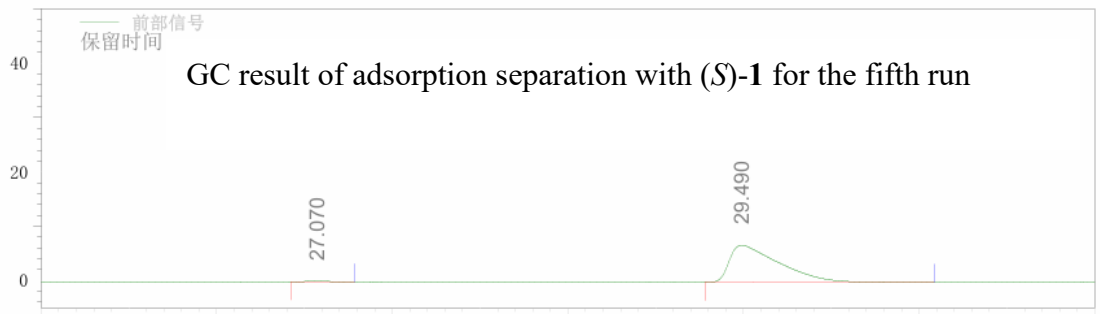

| Serial Number | Retention Time [min] | Peak Area | Area % |
|---------------|----------------------|-----------|--------|
| 1             | 27.070               | 8895      | 0.85   |
| 2             | 29.490               | 1038046   | 99.15  |
| The Total     |                      | 1046941   |        |
